# Supplementary material for: Perceived barriers to cervical cancer screening and motivators for at-home human papillomavirus self-sampling during the COVID-19 pandemic: Results from a telephone survey
Source: eLife journal article supplement (doi:10.7554/elife.84664), 2023-05-26
Supplement: supp [file elife_poa_e84664_Table_1_source_data_1.xls]

## Sheet: PRESTIS-CompletedSurveys_DATA_L
Record ID	H1. What is your race/ethnicity? Would you say... (¿Cuál es su raza/etnicidad? Diría...)	H2. Were you born in the United States? (¿Usted nació en los Estados Unidos?)	H3. In what country were you born? (do not read; categorize after stated) {¿En que país nació? (no leer; categorizar después que contesta)}	H7. What is the highest level of education that you completed? (Don’t read; categorize after stated) {¿Cuál es el nivel más alto de educación que ha completado? (no leer; categorizar después que contesta)}	H3a. Other birth country	H9. Last year, before you paid any taxes, what was your total household income? (El año pasado, antes de pagar impuestos, ¿cuál fue el ingreso total de su hogar?)	That's the end of my questions. Do you have any questions or comments about the survey?{Este es el final de mis preguntas. ¿Tiene preguntas o comentarios sobre esta entrevista?}Thank you so much for your participation. I will be sending you a $20 gift certificate in the mail as appreciation for your time. I just need to verify the address I have on record for you (verify address in OnCore).{Mucha…	Complete?	AA8. Language of interview (Idioma de entrevista)	Verbal consent given?
453	Hispanic (Hispana)	No	México (México)	Some years of elementary school (Algunos años de escuela primaria)		$20,000 - $29,999	No tuvo preguntas.	Complete	Spanish (Español)	Yes
702	Hispanic (Hispana)	No	México (México)	Completed high school (Completó la escuela secundaria)		$20,000 - $29,999	No, ninguna.	Complete	Spanish (Español)	Yes
2055	White (Blanca)	Yes (Si)		Completed college/vocational school (Completó la Universidad o la Escuela Politécnica)		$60,000 - $69,999		Complete	English (Ingles)	Yes
358	Hispanic (Hispana)	No	South American Country (País sud americano)	Some years of elementary school (Algunos años de escuela primaria)				Complete	Spanish (Español)	Yes
412	Hispanic (Hispana)	No	México (México)	Some years of college/vocational school (Algunos años de Universidad o la Escuela Politécnica)		$30,000 - $39,999	Recently got married and has new address. Entered it above.	Complete	Spanish (Español)	Yes
322	Black/African American (Negra/Afro Americana)	Yes (Si)		Completed high school (Completó la escuela secundaria)			No questions or comments	Complete	English (Ingles)	Yes
152	Hispanic (Hispana)	No	Central American Country (País centroamericano)	Completed college/vocational school (Completó la Universidad o la Escuela Politécnica)		$10,000 - $19,999		Complete	Spanish (Español)	Yes
1204	Hispanic (Hispana)	No	México (México)	Completed high school (Completó la escuela secundaria)			She wasn't sure what internet connection she has - her daughter set it up, and she didn't want to answer the questions regarding income.	Complete	Spanish (Español)	Yes
1436	Black/African American (Negra/Afro Americana)	Yes (Si)		Some years of college/vocational school (Algunos años de Universidad o la Escuela Politécnica)			Liked how I asked questions.	Complete	English (Ingles)	Yes
469	White (Blanca)	Yes (Si)		Completed college/vocational school (Completó la Universidad o la Escuela Politécnica)		$10,000 - $19,999	The patient didn't have any questions or comments about the survey. However, the patient was listed in the Arm 3 spreadsheet as not having returned her kit, but she said that she mailed it back months ago. I gave her the phone numbers of the patient navigators so she could request a second kit be sent to her.	Complete	English (Ingles)	Yes
922	Black/African American (Negra/Afro Americana)	Yes (Si)		Completed high school (Completó la escuela secundaria)		$30,000 - $39,999	No comments.	Complete	English (Ingles)	Yes
973	Black/African American (Negra/Afro Americana)	Yes (Si)		Completed high school (Completó la escuela secundaria)		$10,000 - $19,999	No comments or questions.	Complete	English (Ingles)	Yes
2514	Black/African American (Negra/Afro Americana)	Yes (Si)		Completed high school (Completó la escuela secundaria)		$10,000 - $19,999		Complete	English (Ingles)	Yes
991	Hispanic (Hispana)	No	Central American Country (País centroamericano)	Completed high school (Completó la escuela secundaria)		$40,000 - $49,999	Patient also stated that she sends money to her mom and dad not sure if this would be captured in the people who depend on income. Main reason she didn't send in her kit is because she no longer has insurance and threw away the kit.	Complete	Spanish (Español)	Yes
1526	Black/African American (Negra/Afro Americana)	Yes (Si)		Completed high school (Completó la escuela secundaria)		$10,000 - $19,999	No questions or comments	Complete	English (Ingles)	Yes
1745	Hispanic (Hispana)	Yes (Si)		Some years of college/vocational school (Algunos años de Universidad o la Escuela Politécnica)		$10,000 - $19,999	No comments	Complete	English (Ingles)	Yes
2215	Black/African American (Negra/Afro Americana)	Yes (Si)		Completed high school (Completó la escuela secundaria)		$10,000 - $19,999	No Comments	Complete	English (Ingles)	Yes
2621	Hispanic (Hispana)			Completed high school (Completó la escuela secundaria)			Patient did not want to answer some of the sociodemographic questions - we skipped over them.	Complete	Spanish (Español)	Yes
2663	Hispanic (Hispana)	Yes (Si)		Some years of high school (Algunos años de escuela secundaria)		$20,000 - $29,999	When I asked the patient if the pandemic influenced her decision to use the kit she said not really that she didn't think about it this way because she has transportation to get to the clinic but the fact that the navigator called influenced her decision since she wanted to participate in the study.	Complete	Spanish (Español)	Yes
2740	Black/African American (Negra/Afro Americana)	Yes (Si)		Completed college/vocational school (Completó la Universidad o la Escuela Politécnica)			Patient did not remember her household income for last year.	Complete	English (Ingles)	Yes
1718	Hispanic (Hispana)	No	México (México)	Completed elementary school (Completó la escuela primaria)		$10,000 - $19,999	Patient said she felt better once patient navigator called her because prior to that she felt like the kit could be a scam and not be used for what it said it would be used for. She also said she felt a sense of relief when they called her to communicate the test results as the kit was used for what it said.	Complete	Spanish (Español)	Yes
277	Hispanic (Hispana)	No	South American Country (País sud americano)	Completed high school (Completó la escuela secundaria)		$60,000 - $69,999		Complete	Spanish (Español)	Yes
2004	Hispanic (Hispana)	No	México (México)	Completed high school (Completó la escuela secundaria)			Patient stated she didn't return the kit because she was sick for a while but plans on doing it now.	Complete	Spanish (Español)	Yes
2330	Hispanic (Hispana)	No	México (México)	Completed elementary school (Completó la escuela primaria)		$40,000 - $49,999	Said the kit helps a lot. When she said she bled using the kit, said it didn't happen until a week and a half after use. And that it took her 2 days to return the sample because she first tried to drop it off at the clinic but the clinic was closed. The time from her house to the mail box is 2 minutes (what I indicated in the question).	Complete	Spanish (Español)	Yes
2378	Black/African American (Negra/Afro Americana)	Yes (Si)		Some years of high school (Algunos años de escuela secundaria)		$20,000 - $29,999		Complete	English (Ingles)	Yes
2541	Black/African American (Negra/Afro Americana)	Yes (Si)		Completed high school (Completó la escuela secundaria)			The patient said she received a kit in the mail, used it, and sent it back. She also said her kit was never received so she was sent a second one, but she hasn't used it yet.	Complete	English (Ingles)	Yes
1796	Hispanic (Hispana)	No	México (México)	Some years of high school (Algunos años de escuela secundaria)				Complete	Spanish (Español)	Yes
2490	Hispanic (Hispana)	No	México (México)	Completed high school (Completó la escuela secundaria)			Patient did not remember her income.	Complete	Spanish (Español)	Yes
1100	Hispanic (Hispana)	Yes (Si)		Some years of college/vocational school (Algunos años de Universidad o la Escuela Politécnica)		$50,000 - $59,999	The patient has a new address: 9500 West Rd. #704 Houston, TX 77064	Complete	English (Ingles)	Yes
2529	Hispanic (Hispana)	No	México (México)	Some years of high school (Algunos años de escuela secundaria)			Patient doesn't remember a lot, she said she can't recall if the patient navigator called her or not. It also took her a while to remember the kit. She stated that her daughter was the one that returned the kit to the post office so she's not sure when she did that or how long it took her to drive there. She did state that the exam hurt her a lot. Also, she lives with her daughter so wasn't sure …	Complete	Spanish (Español)	Yes
2651	Hispanic (Hispana)	No	México (México)	Some years of college/vocational school (Algunos años de Universidad o la Escuela Politécnica)				Complete	Spanish (Español)	Yes
2082	Hispanic (Hispana)	No	Central American Country (País centroamericano)	Some years of high school (Algunos años de escuela secundaria)				Complete	Spanish (Español)	Yes
2683	Hispanic (Hispana)	No	Central American Country (País centroamericano)	Some years of college/vocational school (Algunos años de Universidad o la Escuela Politécnica)		$30,000 - $39,999		Complete	Spanish (Español)	Yes
2876	Hispanic (Hispana)	No	México (México)	Completed high school (Completó la escuela secundaria)		$10,000 - $19,999	Patient stated that she got COVID-19 so this is why she hasn't returned the kit but she plans on it.	Complete	Spanish (Español)	Yes
402	Hispanic (Hispana)	No	Central American Country (País centroamericano)	Some years of elementary school (Algunos años de escuela primaria)		$10,000 - $19,999		Complete	Spanish (Español)	Yes
655	Black/African American (Negra/Afro Americana)	Yes (Si)		Completed high school (Completó la escuela secundaria)		<$10,000	No comments	Complete	English (Ingles)	Yes
3226	Hispanic (Hispana)	No	México (México)	Completed high school (Completó la escuela secundaria)		$10,000 - $19,999		Complete	Spanish (Español)	Yes
2059	Hispanic (Hispana)	No	Central American Country (País centroamericano)					Complete	Spanish (Español)	Yes
3051	Other (Otra)	No	México (México)	Some years of elementary school (Algunos años de escuela primaria)		$10,000 - $19,999		Complete	Spanish (Español)	Yes
230	Black/African American (Negra/Afro Americana)	Yes (Si)		Completed college/vocational school (Completó la Universidad o la Escuela Politécnica)		$20,000 - $29,999	Patient had no comments or questions. She said that she never got her results back, so I gave her the phone numbers of the patient navigators. Susan reached out to the patient navigators, who said that they gave the patient her results on 9/9/20, but that they'd give her another call to remind her of her results.	Complete	English (Ingles)	Yes
3057	Hispanic (Hispana)	No	México (México)	Completed elementary school (Completó la escuela primaria)				Complete	Spanish (Español)	Yes
3358	Hispanic (Hispana)	No	México (México)	Completed elementary school (Completó la escuela primaria)		$10,000 - $19,999		Complete	Spanish (Español)	Yes
3499	Black/African American (Negra/Afro Americana)	Yes (Si)		Completed high school (Completó la escuela secundaria)		<$10,000	Patient had no comments or questions about the survey. She says she's planning to do the kit soon.	Complete	English (Ingles)	Yes
3065	Other (Otra)	Yes (Si)		Completed college/vocational school (Completó la Universidad o la Escuela Politécnica)		$30,000 - $39,999	No questions or comments	Complete	English (Ingles)	Yes
3380	Asian (Asiática)	No	Asian Country (País asiático)	Completed college/vocational school (Completó la Universidad o la Escuela Politécnica)		>$70,000		Complete	English (Ingles)	Yes
3614	Hispanic (Hispana)	No	Central American Country (País centroamericano)	Completed college/vocational school (Completó la Universidad o la Escuela Politécnica)		$10,000 - $19,999	She asked about who will see the answers to her questions, since it included a lot of personal information. I reassured her that her information and all of her responses will be kept confidential.	Complete	English (Ingles)	Yes
3868	Hispanic (Hispana)	No	México (México)	Completed elementary school (Completó la escuela primaria)				Complete	Spanish (Español)	Yes
4033	Hispanic (Hispana)	No	Central American Country (País centroamericano)	Completed elementary school (Completó la escuela primaria)			Loved the kit it was great for her.	Complete	Spanish (Español)	Yes
4036	Hispanic (Hispana)	No	México (México)	Completed elementary school (Completó la escuela primaria)				Complete	Spanish (Español)	Yes
3618	Hispanic (Hispana)	No	México (México)	Some years of elementary school (Algunos años de escuela primaria)				Complete	Spanish (Español)	Yes
3647	Hispanic (Hispana)	No	México (México)	Completed elementary school (Completó la escuela primaria)				Complete	Spanish (Español)	Yes
3604	Hispanic (Hispana)	No	México (México)	Some years of elementary school (Algunos años de escuela primaria)			Doesn't remember income.	Complete	Spanish (Español)	Yes
3621	Hispanic (Hispana)	No	México (México)	Completed high school (Completó la escuela secundaria)			Really thankful for the kit. She also mentioned she didn't work last year so no income to report.	Complete	Spanish (Español)	Yes
4240	Black/African American (Negra/Afro Americana)	No	European Country (País Europeo)	Completed high school (Completó la escuela secundaria)		<$10,000	The patient had just had a hysterectomy and her doctor advised her not to use the kit until she was fully healed. She said that she plans to complete the kit and return it when her doctor says it's safe.	Complete	English (Ingles)	Yes
3644	Hispanic (Hispana)	No	México (México)	Some years of elementary school (Algunos años de escuela primaria)				Complete	Spanish (Español)	Yes
4063	Hispanic (Hispana)	No	México (México)	Completed high school (Completó la escuela secundaria)				Complete	Spanish (Español)	Yes
3671	Hispanic (Hispana)	No	México (México)	Completed high school (Completó la escuela secundaria)		$30,000 - $39,999		Complete	Spanish (Español)	Yes
3387	Hispanic (Hispana)	No	México (México)	Completed high school (Completó la escuela secundaria)			gave patient the navigator's number because she doesn't recall receiving the kit	Complete	Spanish (Español)	Yes
3606	Hispanic (Hispana)	No	Central American Country (País centroamericano)					Complete	Spanish (Español)	Yes
4886	Hispanic (Hispana)	No	México (México)	Some years of high school (Algunos años de escuela secundaria)		$20,000 - $29,999		Complete	Spanish (Español)	Yes
4895	Black/African American (Negra/Afro Americana)	Yes (Si)		Completed college/vocational school (Completó la Universidad o la Escuela Politécnica)		$10,000 - $19,999	No questions or comments	Complete	English (Ingles)	Yes
4392	Hispanic (Hispana)	Yes (Si)		Completed high school (Completó la escuela secundaria)		<$10,000	No questions	Complete	English (Ingles)	Yes
4553	Hispanic (Hispana)	No	México (México)	Completed elementary school (Completó la escuela primaria)		$20,000 - $29,999		Complete	Spanish (Español)	Yes
4600	Hispanic (Hispana)	No	Central American Country (País centroamericano)	Some years of high school (Algunos años de escuela secundaria)				Complete	Spanish (Español)	Yes
4424	Black/African American (Negra/Afro Americana)	Yes (Si)		Completed high school (Completó la escuela secundaria)		$10,000 - $19,999	No questions or comments	Complete	English (Ingles)	Yes
4723	White (Blanca)	Yes (Si)		Some years of college/vocational school (Algunos años de Universidad o la Escuela Politécnica)		$20,000 - $29,999	No comments or questions	Complete	English (Ingles)	Yes
4403	Hispanic (Hispana)	No	Central American Country (País centroamericano)	Completed elementary school (Completó la escuela primaria)				Complete	Spanish (Español)	Yes
4539	Hispanic (Hispana)	Yes (Si)		Some years of college/vocational school (Algunos años de Universidad o la Escuela Politécnica)		<$10,000	Asked about what type of cancer HPV can cause (she wanted to know if her answers to the questions in section G were correct).	Complete	English (Ingles)	Yes
4442	Hispanic (Hispana)	Yes (Si)		Completed elementary school (Completó la escuela primaria)		$10,000 - $19,999	No questions or comments	Complete	English (Ingles)	Yes
4774	Hispanic (Hispana)	Yes (Si)		Some years of high school (Algunos años de escuela secundaria)		<$10,000	No questions or comments	Complete	English (Ingles)	Yes
5139	Hispanic (Hispana)	No	México (México)	Some years of college/vocational school (Algunos años de Universidad o la Escuela Politécnica)				Complete	Spanish (Español)	Yes
5212	Hispanic (Hispana)	No	Central American Country (País centroamericano)	Some years of high school (Algunos años de escuela secundaria)				Complete	Spanish (Español)	Yes
5202	Hispanic (Hispana)	Yes (Si)		Completed elementary school (Completó la escuela primaria)				Complete	Spanish (Español)	Yes
5371	Black/African American (Negra/Afro Americana)	Yes (Si)		Completed college/vocational school (Completó la Universidad o la Escuela Politécnica)		$10,000 - $19,999	No questions or comments.	Complete	English (Ingles)	Yes
4802	Hispanic (Hispana)	Yes (Si)		Some years of college/vocational school (Algunos años de Universidad o la Escuela Politécnica)			No comments or questions	Complete	English (Ingles)	Yes
5245	Hispanic (Hispana)	No	Central American Country (País centroamericano)	Completed elementary school (Completó la escuela primaria)		$20,000 - $29,999		Complete	Spanish (Español)	Yes
5352	Hispanic (Hispana)	No	Central American Country (País centroamericano)	Completed elementary school (Completó la escuela primaria)			Told me she only worked for 6 months last year and doesn't recall her income.	Complete	Spanish (Español)	Yes
4460	Black/African American (Negra/Afro Americana)	Yes (Si)		Completed high school (Completó la escuela secundaria)			Patient said she preferred not to answer when I asked what her annual income was. Patient had no questions or comments about the survey. She also said she never got her kit in the mail, so I gave her the phone number for the patient navigators so she can ask if they could send her a second one.	Complete	English (Ingles)	Yes
5016	Black/African American (Negra/Afro Americana)	Yes (Si)		Some years of college/vocational school (Algunos años de Universidad o la Escuela Politécnica)			No questions or comments. She couldn't remember how much her household income was, so I left that field blank. She said her income came from her disability checks, but she didn't know the amount.	Complete	English (Ingles)	Yes
5129	White (Blanca)	Yes (Si)		Some years of college/vocational school (Algunos años de Universidad o la Escuela Politécnica)		$10,000 - $19,999	No comments or questions.	Complete	English (Ingles)	Yes
4443	Hispanic (Hispana)	No	México (México)	Some years of high school (Algunos años de escuela secundaria)			doesn't know income	Complete	Spanish (Español)	Yes
4468	Hispanic (Hispana)	No	Central American Country (País centroamericano)	Some years of elementary school (Algunos años de escuela primaria)				Complete	Spanish (Español)	Yes
4480	Hispanic (Hispana)	No	México (México)	Completed high school (Completó la escuela secundaria)				Complete	Spanish (Español)	Yes
4794	Black/African American (Negra/Afro Americana)	Yes (Si)		Some years of college/vocational school (Algunos años de Universidad o la Escuela Politécnica)		$20,000 - $29,999	No questions or comments	Complete	English (Ingles)	Yes
4983	Hispanic (Hispana)	No	México (México)	Completed elementary school (Completó la escuela primaria)			PAtient told me that she had originally done the test but never sent it back because she had an accident and forgot about it. Gave her the navigator's number to request a new kit.	Complete	English (Ingles)	Yes
5420	Hispanic (Hispana)	No	México (México)	Completed elementary school (Completó la escuela primaria)				Complete	Spanish (Español)	Yes
5303	Hispanic (Hispana)	No	México (México)	Completed elementary school (Completó la escuela primaria)				Complete	Spanish (Español)	Yes
5512	Black/African American (Negra/Afro Americana)	Yes (Si)		Some years of college/vocational school (Algunos años de Universidad o la Escuela Politécnica)		<$10,000	No comments or questions	Complete	English (Ingles)	Yes
5534	Black/African American (Negra/Afro Americana)	Yes (Si)		Completed college/vocational school (Completó la Universidad o la Escuela Politécnica)		$20,000 - $29,999	No questions or comments	Complete	English (Ingles)	Yes
5623	Black/African American (Negra/Afro Americana)	Yes (Si)		Some years of college/vocational school (Algunos años de Universidad o la Escuela Politécnica)		<$10,000	No questions or comments	Complete	English (Ingles)	Yes
5937	Hispanic (Hispana)	No	Central American Country (País centroamericano)	Some years of elementary school (Algunos años de escuela primaria)		$10,000 - $19,999		Complete	Spanish (Español)	Yes
5671	Asian (Asiática)	No	Asian Country (País asiático)	Completed college/vocational school (Completó la Universidad o la Escuela Politécnica)		$10,000 - $19,999	No Questions or Comments	Complete	English (Ingles)	Yes
5820	Hispanic (Hispana)	No	South American Country (País sud americano)	Completed college/vocational school (Completó la Universidad o la Escuela Politécnica)		<$10,000		Complete	Spanish (Español)	Yes
5932	Hispanic (Hispana)	Yes (Si)		Some years of high school (Algunos años de escuela secundaria)		$10,000 - $19,999	No questions or comments	Complete	English (Ingles)	Yes
5621	Hispanic (Hispana)	No	Central American Country (País centroamericano)	Completed high school (Completó la escuela secundaria)		$10,000 - $19,999		Complete	Spanish (Español)	Yes
5811	Hispanic (Hispana)	No	México (México)	Completed elementary school (Completó la escuela primaria)				Complete	Spanish (Español)	Yes
5848	Hispanic (Hispana)	No	Central American Country (País centroamericano)	Completed high school (Completó la escuela secundaria)				Complete	Spanish (Español)	Yes
5694	Hispanic (Hispana)	No	México (México)	Completed elementary school (Completó la escuela primaria)		$20,000 - $29,999		Complete	Spanish (Español)	Yes
4967	Hispanic (Hispana)	No	México (México)	Completed elementary school (Completó la escuela primaria)			She wasn't sure how to classify the clinic she goes to and didn't know her annual income - husband takes care of that.	Complete	Spanish (Español)	Yes
5393	Hispanic (Hispana)	No	México (México)	Some years of high school (Algunos años de escuela secundaria)			Doesn't know annual income	Complete	Spanish (Español)	Yes
4930	Hispanic (Hispana)	No	México (México)	Completed elementary school (Completó la escuela primaria)				Complete	Spanish (Español)	Yes
5577	Hispanic (Hispana)	No	México (México)	Some years of high school (Algunos años de escuela secundaria)				Complete	Spanish (Español)	Yes
6089	Hispanic (Hispana)	No	México (México)	Some years of college/vocational school (Algunos años de Universidad o la Escuela Politécnica)			doesn't recall income	Complete	Spanish (Español)	Yes
6291	Hispanic (Hispana)	No	México (México)	Completed elementary school (Completó la escuela primaria)			doesn't remember income; patient told me she actually had a PAP test done yesterday	Complete	Spanish (Español)	Yes
6420	White (Blanca)	No	Central American Country (País centroamericano)	Completed elementary school (Completó la escuela primaria)		<$10,000		Complete	Spanish (Español)	Yes
6356	Black/African American (Negra/Afro Americana)	No	Other (Otro)	Completed high school (Completó la escuela secundaria)	Jamaica		No questions or comments. Participant chose to skip the questions about her income.	Complete	English (Ingles)	Yes
6215	Hispanic (Hispana)	Yes (Si)		Completed high school (Completó la escuela secundaria)		$20,000 - $29,999	No questions or comments	Complete	English (Ingles)	Yes
6448	Black/African American (Negra/Afro Americana)	Yes (Si)		Completed college/vocational school (Completó la Universidad o la Escuela Politécnica)			No questions or comments. Patient chose to skip questions about her income.	Complete	English (Ingles)	Yes
6720	Hispanic (Hispana)	No	México (México)	Completed high school (Completó la escuela secundaria)		$40,000 - $49,999		Complete	Spanish (Español)	Yes
5775	Hispanic (Hispana)	Yes (Si)		Completed high school (Completó la escuela secundaria)		$30,000 - $39,999		Complete	Spanish (Español)	Yes
6816	Hispanic (Hispana)	No	México (México)	Some years of college/vocational school (Algunos años de Universidad o la Escuela Politécnica)		$20,000 - $29,999		Complete	Spanish (Español)	Yes
5766	Hispanic (Hispana)	Yes (Si)		Completed high school (Completó la escuela secundaria)		<$10,000	Patient had questions about the kit instructions because she has mobility issues, so I gave her the phone numbers for the patient navigators.	Complete	English (Ingles)	Yes
6021	Hispanic (Hispana)	No	México (México)	Some years of high school (Algunos años de escuela secundaria)		$40,000 - $49,999		Complete	Spanish (Español)	Yes
6268	Hispanic (Hispana)	No	México (México)	Completed elementary school (Completó la escuela primaria)			Patient told me she did not return the kit even after taking the sample because she took it into her other clinic thinking it was from there.	Complete	Spanish (Español)	Yes
6929	Hispanic (Hispana)	No	México (México)	Some years of high school (Algunos años de escuela secundaria)		$10,000 - $19,999		Complete	Spanish (Español)	Yes
7224	Hispanic (Hispana)	No	México (México)	Completed elementary school (Completó la escuela primaria)		$20,000 - $29,999		Complete	Spanish (Español)	Yes
6286	Hispanic (Hispana)	No	Central American Country (País centroamericano)	Some years of high school (Algunos años de escuela secundaria)		$10,000 - $19,999		Complete	Spanish (Español)	Yes
5490	Hispanic (Hispana)	No	México (México)	Some years of elementary school (Algunos años de escuela primaria)				Complete	Spanish (Español)	Yes
6288	Hispanic (Hispana)	No	Central American Country (País centroamericano)	Completed elementary school (Completó la escuela primaria)		$30,000 - $39,999		Complete	Spanish (Español)	Yes
6097	Hispanic (Hispana)	No	Central American Country (País centroamericano)	Completed high school (Completó la escuela secundaria)			Doesn't know how she connects to the internet nor her income states she hasn't worked in 2 years due to health reasons.	Complete	Spanish (Español)	Yes
5874	White (Blanca)	Yes (Si)		Completed high school (Completó la escuela secundaria)		$30,000 - $39,999	Patient threw her kit away, but she wishes she hadn't. I gave her the phone numbers for the patient navigators, but I told her I couldn't make any promises about whether or not they could send her another kit.	Complete	English (Ingles)	Yes
5085	Hispanic (Hispana)	No	Central American Country (País centroamericano)	Some years of elementary school (Algunos años de escuela primaria)			Doesn't recall income.	Complete	Spanish (Español)	Yes
6770	White (Blanca)	No	México (México)	Some years of college/vocational school (Algunos años de Universidad o la Escuela Politécnica)			Doesn't recall income.	Complete	Spanish (Español)	Yes
5724	White (Blanca)	Yes (Si)		Completed college/vocational school (Completó la Universidad o la Escuela Politécnica)		$10,000 - $19,999	No questions or comments	Complete	English (Ingles)	Yes
6550	Hispanic (Hispana)	No	Central American Country (País centroamericano)	Completed elementary school (Completó la escuela primaria)			Doesn't know if she dropped the kit off at the mail/post office or took it to the clinic	Complete	English (Ingles)	Yes
7239	Hispanic (Hispana)	No	Central American Country (País centroamericano)	Completed high school (Completó la escuela secundaria)		$10,000 - $19,999		Complete	Spanish (Español)	Yes
7425	Hispanic (Hispana)	No	México (México)	Completed college/vocational school (Completó la Universidad o la Escuela Politécnica)		$30,000 - $39,999		Complete	Spanish (Español)	Yes
7934	Hispanic (Hispana)	No	Central American Country (País centroamericano)	Some years of high school (Algunos años de escuela secundaria)				Complete	Spanish (Español)	Yes
7279	Hispanic (Hispana)	No	México (México)	Completed elementary school (Completó la escuela primaria)		$20,000 - $29,999		Complete	Spanish (Español)	Yes
7935	Hispanic (Hispana)	No	México (México)	Completed elementary school (Completó la escuela primaria)		<$10,000		Complete	Spanish (Español)	Yes
7314	Hispanic (Hispana)	Yes (Si)		Some years of high school (Algunos años de escuela secundaria)		<$10,000	No questions or comments	Complete	English (Ingles)	Yes
7594	White (Blanca)	Yes (Si)		Completed high school (Completó la escuela secundaria)		$20,000 - $29,999	No questions or comments	Complete	English (Ingles)	Yes
2288	White (Blanca)	Yes (Si)		Some years of high school (Algunos años de escuela secundaria)			Participant chose to skip the questions about her income. She had no questions or comments about the survey.	Complete	English (Ingles)	Yes
7148	Hispanic (Hispana)	No	México (México)	Some years of high school (Algunos años de escuela secundaria)				Complete	Spanish (Español)	Yes
7062	Black/African American (Negra/Afro Americana)	Yes (Si)		Completed college/vocational school (Completó la Universidad o la Escuela Politécnica)		$30,000 - $39,999	No questions or comments	Complete	English (Ingles)	Yes
7648	Black/African American (Negra/Afro Americana)	Yes (Si)		Completed college/vocational school (Completó la Universidad o la Escuela Politécnica)		$10,000 - $19,999	No questions or comments.	Complete	English (Ingles)	Yes
7064	Hispanic (Hispana)	No	México (México)	Some years of high school (Algunos años de escuela secundaria)		$30,000 - $39,999		Complete	Spanish (Español)	Yes
8312	Hispanic (Hispana)	No	Central American Country (País centroamericano)	Completed high school (Completó la escuela secundaria)				Complete	Spanish (Español)	Yes
6085	Hispanic (Hispana)	No	México (México)	Completed elementary school (Completó la escuela primaria)				Complete	Spanish (Español)	Yes
7323	Hispanic (Hispana)	No	México (México)	Some years of college/vocational school (Algunos años de Universidad o la Escuela Politécnica)				Complete	Spanish (Español)	Yes
7243	Hispanic (Hispana)	No	México (México)	Completed elementary school (Completó la escuela primaria)				Complete	Spanish (Español)	Yes
2300	Black/African American (Negra/Afro Americana)	Yes (Si)		Completed high school (Completó la escuela secundaria)		$20,000 - $29,999	No questions or comments	Complete	English (Ingles)	Yes
7555	Hispanic (Hispana)	No	México (México)	Completed elementary school (Completó la escuela primaria)				Complete	Spanish (Español)	Yes
7123	Hispanic (Hispana)	No	Central American Country (País centroamericano)	Completed high school (Completó la escuela secundaria)		$20,000 - $29,999		Complete	Spanish (Español)	Yes
6342	Hispanic (Hispana)	No	Central American Country (País centroamericano)	Some years of elementary school (Algunos años de escuela primaria)				Complete	Spanish (Español)	Yes
6592	Black/African American (Negra/Afro Americana)	Yes (Si)		Some years of college/vocational school (Algunos años de Universidad o la Escuela Politécnica)		$20,000 - $29,999	Patient asked what the survey would be used for, so I told her it was to learn about her experience with the kit and see if it will help women in the future.	Complete	English (Ingles)	Yes
7677	Hispanic (Hispana)	No	México (México)	Completed high school (Completó la escuela secundaria)			Did not work last year - so no income	Complete	Spanish (Español)	Yes
6633	Hispanic (Hispana)	No	Central American Country (País centroamericano)					Complete	Spanish (Español)	Yes
7320	Black/African American (Negra/Afro Americana)	Yes (Si)		Completed high school (Completó la escuela secundaria)		$30,000 - $39,999	No questions or comments about the survey.	Complete	English (Ingles)	Yes
8307	Hispanic (Hispana)	No	Central American Country (País centroamericano)	Some years of high school (Algunos años de escuela secundaria)		$10,000 - $19,999		Complete	Spanish (Español)	Yes
7121	Hispanic (Hispana)	No	Central American Country (País centroamericano)	Some years of high school (Algunos años de escuela secundaria)				Complete	Spanish (Español)	Yes
8680	Hispanic (Hispana)	No	México (México)	Never went to school (Nunca fué a la escuela)		$10,000 - $19,999		Complete	Spanish (Español)	Yes
6548	Black/African American (Negra/Afro Americana)	Yes (Si)		Completed high school (Completó la escuela secundaria)		$30,000 - $39,999	No questions or comments.	Complete	English (Ingles)	Yes
7788	Hispanic (Hispana)	No	México (México)	Never went to school (Nunca fué a la escuela)				Complete	Spanish (Español)	Yes
8026	White (Blanca)	No	México (México)	Completed high school (Completó la escuela secundaria)		$30,000 - $39,999		Complete	Spanish (Español)	Yes
8901	Hispanic (Hispana)	No	Central American Country (País centroamericano)	Some years of elementary school (Algunos años de escuela primaria)				Complete	Spanish (Español)	Yes
5901	Black/African American (Negra/Afro Americana)	Yes (Si)		Some years of college/vocational school (Algunos años de Universidad o la Escuela Politécnica)		$20,000 - $29,999	No questions or comments	Complete	English (Ingles)	Yes
6436	Black/African American (Negra/Afro Americana)	Yes (Si)		Completed college/vocational school (Completó la Universidad o la Escuela Politécnica)		$10,000 - $19,999	No Questions or Comments	Complete	English (Ingles)	Yes
9854	Hispanic (Hispana)	No	Central American Country (País centroamericano)	Completed high school (Completó la escuela secundaria)		$30,000 - $39,999	Patient did not receive kit.	Complete	Spanish (Español)	Yes
8550	Asian (Asiática)	No	Central American Country (País centroamericano)	Some years of elementary school (Algunos años de escuela primaria)		$10,000 - $19,999		Complete	Spanish (Español)	Yes
6799	Black/African American (Negra/Afro Americana)	Yes (Si)		Completed high school (Completó la escuela secundaria)		<$10,000	No comments or questions	Complete	English (Ingles)	Yes
8952	Hispanic (Hispana)	No	México (México)	Completed elementary school (Completó la escuela primaria)			Doesn't recall income or the name of the clinic she goes to that is not part of Harris Health.	Complete	Spanish (Español)	Yes
9809	Hispanic (Hispana)	No	Central American Country (País centroamericano)	Some years of high school (Algunos años de escuela secundaria)			Doesn't recall income, said she only worked one week last year.	Complete	Spanish (Español)	Yes
10035	Hispanic (Hispana)	No	México (México)	Completed high school (Completó la escuela secundaria)			For question D14, it took her a week to send back the kit in the mail. So that would be 10,080 minutes. It doesn't let me enter this into the text box. She also does not recall her income.	Complete	Spanish (Español)	Yes
7827	Hispanic (Hispana)	Yes (Si)		Some years of high school (Algunos años de escuela secundaria)				Complete	English (Ingles)	Yes
6304	Black/African American (Negra/Afro Americana)	Yes (Si)		Some years of high school (Algunos años de escuela secundaria)		$40,000 - $49,999	No questions or comments about the survey.	Complete	English (Ingles)	Yes
7930	White (Blanca)	Yes (Si)		Completed college/vocational school (Completó la Universidad o la Escuela Politécnica)		$40,000 - $49,999	No questions or comments	Complete	English (Ingles)	Yes
8815	Hispanic (Hispana)	No	Central American Country (País centroamericano)	Completed elementary school (Completó la escuela primaria)			Doesn't recall income.	Complete	Spanish (Español)	Yes
8986	Hispanic (Hispana)	No	México (México)	Some years of high school (Algunos años de escuela secundaria)			Doesn't recall income.	Complete	Spanish (Español)	Yes
8062	Hispanic (Hispana)	No	México (México)	Completed elementary school (Completó la escuela primaria)			Said that last year they didn't file taxes because her husband is retired and she did not work.	Complete	Spanish (Español)	Yes
8055	Black/African American (Negra/Afro Americana)	Yes (Si)		Some years of high school (Algunos años de escuela secundaria)			No questions or comments about the survey. She didn't want to answer the questions about her income so we skipped those.	Complete	English (Ingles)	Yes
8698	Black/African American (Negra/Afro Americana)	Yes (Si)		Completed college/vocational school (Completó la Universidad o la Escuela Politécnica)		$20,000 - $29,999	No questions or comments.	Complete	English (Ingles)	Yes
9532	Hispanic (Hispana)	No	México (México)	Completed elementary school (Completó la escuela primaria)		$10,000 - $19,999		Complete	Spanish (Español)	Yes
7746	Hispanic (Hispana)	No	México (México)	Never went to school (Nunca fué a la escuela)			She put the kit in the mailbox two days after she took her sample. Doesn't recall how much time it took her to collect her sample.	Complete	Spanish (Español)	Yes
8682	Hispanic (Hispana)	No	Central American Country (País centroamericano)	Completed high school (Completó la escuela secundaria)			Doesn't recall income - just said it was not a good year.	Complete	Spanish (Español)	Yes
8774	Hispanic (Hispana)	No	México (México)	Completed elementary school (Completó la escuela primaria)			Doesn't recall income.	Complete	Spanish (Español)	Yes
8248	Hispanic (Hispana)	Yes (Si)		Completed high school (Completó la escuela secundaria)		$40,000 - $49,999	No questions or comments	Complete	English (Ingles)	Yes
8604	Hispanic (Hispana)	Yes (Si)		Completed high school (Completó la escuela secundaria)		<$10,000	No Questions or Concerns.	Complete	English (Ingles)	Yes
8001	Hispanic (Hispana)	Yes (Si)		Some years of high school (Algunos años de escuela secundaria)		$20,000 - $29,999	Patient said she enjoyed the survey because she doesn't usually get calls like this, and she asked a few questions about if she could get the HPV vaccine. I suggested she talk to her doctor about the vaccine because I wasn't sure if it would be covered by insurance due to her age.	Complete	English (Ingles)	Yes
10059	Hispanic (Hispana)	No	Central American Country (País centroamericano)	Completed high school (Completó la escuela secundaria)			Doesn't recall income.	Complete	Spanish (Español)	Yes
10455	Hispanic (Hispana)	No	Central American Country (País centroamericano)	Completed elementary school (Completó la escuela primaria)		$10,000 - $19,999		Complete	Spanish (Español)	Yes
10273	Hispanic (Hispana)	No	México (México)	Some years of elementary school (Algunos años de escuela primaria)			- couldn't tell me what her biggest worry following the at home test was - wasn't sure if her phone connected to the internet/if she had wifi at her house (but no computer or tablet available at her house) - doesn't recall income	Complete	Spanish (Español)	Yes
9749	Hispanic (Hispana)	No	México (México)	Some years of college/vocational school (Algunos años de Universidad o la Escuela Politécnica)		$10,000 - $19,999		Complete	Spanish (Español)	Yes
8161	Black/African American (Negra/Afro Americana)	Yes (Si)		Completed college/vocational school (Completó la Universidad o la Escuela Politécnica)		$50,000 - $59,999	No questions or comments.	Complete	English (Ingles)	Yes
9713	Hispanic (Hispana)	No	México (México)	Completed elementary school (Completó la escuela primaria)			Doesn't recall income.	Complete	Spanish (Español)	Yes
9446	Black/African American (Negra/Afro Americana)	Yes (Si)		Some years of college/vocational school (Algunos años de Universidad o la Escuela Politécnica)			We updated her address to: 14226 Canton spring lane Houston, Texas, 77044	Complete	English (Ingles)	Yes
8896	Black/African American (Negra/Afro Americana)	Yes (Si)		Completed college/vocational school (Completó la Universidad o la Escuela Politécnica)		>$70,000		Complete	English (Ingles)	Yes
10200	Hispanic (Hispana)	No	México (México)	Completed high school (Completó la escuela secundaria)				Complete	Spanish (Español)	Yes
10272	Black/African American (Negra/Afro Americana)	Yes (Si)		Some years of college/vocational school (Algunos años de Universidad o la Escuela Politécnica)				Complete	English (Ingles)	Yes
9576	Black/African American (Negra/Afro Americana)	Yes (Si)		Some years of college/vocational school (Algunos años de Universidad o la Escuela Politécnica)		$10,000 - $19,999		Complete	English (Ingles)	Yes
8797	Black/African American (Negra/Afro Americana)	Yes (Si)		Some years of high school (Algunos años de escuela secundaria)			No questions or comments	Complete	English (Ingles)	Yes
10116	Black/African American (Negra/Afro Americana)	Yes (Si)		Some years of college/vocational school (Algunos años de Universidad o la Escuela Politécnica)		<$10,000	She made a Youtube video recommending the kit!	Complete	English (Ingles)	Yes
10249	Hispanic (Hispana)	No	México (México)	Some years of high school (Algunos años de escuela secundaria)		<$10,000	She had some questions about the vaccine, I shared with her the patient navigator's number.	Complete	Spanish (Español)	Yes
10457	Black/African American (Negra/Afro Americana)	No	Other (Otro)	Completed college/vocational school (Completó la Universidad o la Escuela Politécnica)	Jamaica		This patient emphasized that she would not self-sample again because she believes that she is not as capable to properly sample as a doctor. She also thinks that her kit was lost in the mail because she returned it a while ago and has not received any confirmation. She also wanted to know if she is eligible to get the HPV vaccine.	Complete	English (Ingles)	Yes
13260	White (Blanca)	Yes (Si)		Completed high school (Completó la escuela secundaria)			She said that she returned the kit, but it does not appeared returned in the spreadsheet.	Complete	English (Ingles)	Yes
9702	Hispanic (Hispana)	Yes (Si)		Some years of high school (Algunos años de escuela secundaria)		<$10,000	No comments	Complete	English (Ingles)	Yes
10630	Hispanic (Hispana)	Yes (Si)		Some years of high school (Algunos años de escuela secundaria)				Complete	English (Ingles)	Yes
10760	Hispanic (Hispana)	No	South American Country (País sud americano)	Completed elementary school (Completó la escuela primaria)				Complete	Spanish (Español)	Yes
10808	Hispanic (Hispana)	No	México (México)	Some years of high school (Algunos años de escuela secundaria)				Complete	Spanish (Español)	Yes
11073	Hispanic (Hispana)	Yes (Si)		Completed high school (Completó la escuela secundaria)		<$10,000	No questions or comments	Complete	English (Ingles)	Yes
11482	Hispanic (Hispana)	No	Central American Country (País centroamericano)	Completed elementary school (Completó la escuela primaria)		<$10,000		Complete	Spanish (Español)	Yes
10517	Black/African American (Negra/Afro Americana)	Yes (Si)		Completed college/vocational school (Completó la Universidad o la Escuela Politécnica)				Complete	English (Ingles)	Yes
10675	Hispanic (Hispana)	No	México (México)	Some years of high school (Algunos años de escuela secundaria)		$10,000 - $19,999		Complete	Spanish (Español)	Yes
14069	Black/African American (Negra/Afro Americana)	Yes (Si)		Some years of high school (Algunos años de escuela secundaria)		<$10,000		Complete	English (Ingles)	Yes
10557	Black/African American (Negra/Afro Americana)	Yes (Si)		Completed college/vocational school (Completó la Universidad o la Escuela Politécnica)		$20,000 - $29,999		Complete	English (Ingles)	Yes
13273	Hispanic (Hispana)	No	México (México)	Completed high school (Completó la escuela secundaria)		<$10,000	Question: does the self-sampling kit test for both hpv and cervical cancer? Gave her patient navigator phone number.	Complete	Spanish (Español)	Yes
11430	Hispanic (Hispana)	No	México (México)	Completed high school (Completó la escuela secundaria)		$30,000 - $39,999		Complete	English (Ingles)	Yes
11098	Hispanic (Hispana)	No	Central American Country (País centroamericano)	Some years of college/vocational school (Algunos años de Universidad o la Escuela Politécnica)		$10,000 - $19,999	No questions or comments.	Complete	English (Ingles)	Yes
11391	Hispanic (Hispana)	No	México (México)	Some years of high school (Algunos años de escuela secundaria)		$10,000 - $19,999	She mentioned that she sent the kit back already and has not received the results. We do not have her kit as received in records.	Complete	Spanish (Español)	Yes
12009	Black/African American (Negra/Afro Americana)	Yes (Si)		Some years of college/vocational school (Algunos años de Universidad o la Escuela Politécnica)		$40,000 - $49,999	No questions or comments	Complete	English (Ingles)	Yes
12116	Hispanic (Hispana)	Yes (Si)		Some years of college/vocational school (Algunos años de Universidad o la Escuela Politécnica)		$30,000 - $39,999	no questions or comments.	Complete	English (Ingles)	Yes
11299	Black/African American (Negra/Afro Americana)	No	European Country (País Europeo)	Completed college/vocational school (Completó la Universidad o la Escuela Politécnica)			Patient chose not to answer the questions about her household income.	Complete	English (Ingles)	Yes
11446	Black/African American (Negra/Afro Americana)	Yes (Si)		Some years of college/vocational school (Algunos años de Universidad o la Escuela Politécnica)		$10,000 - $19,999	Patient says she lost her kit but still wants to take it, so I gave her the phone numbers of the patient navigators so she can find out if they can send another one.	Complete	English (Ingles)	Yes
11677	Other (Otra)	Yes (Si)		Completed high school (Completó la escuela secundaria)			The patient chose to skip questions C1p, H9, and H10. She also mentioned that she she didn't like the test because she thought the test was uncomfortable (but not painful). She chose the category "other" for the race/ethnicity question because she is Native American.	Complete	English (Ingles)	Yes
11969	White (Blanca)	No	European Country (País Europeo)	Completed college/vocational school (Completó la Universidad o la Escuela Politécnica)		$10,000 - $19,999	No questions or comments	Complete	English (Ingles)	Yes
12196	Hispanic (Hispana)	No	México (México)	Completed elementary school (Completó la escuela primaria)		$20,000 - $29,999	3207 Dennis St Houston TX 77004	Complete	Spanish (Español)	Yes
13253	Hispanic (Hispana)	No	Central American Country (País centroamericano)	Some years of college/vocational school (Algunos años de Universidad o la Escuela Politécnica)		$30,000 - $39,999	8214 Albacore Dr. Houston TX 77074	Complete	Spanish (Español)	Yes
13305	Hispanic (Hispana)	No	Central American Country (País centroamericano)	Completed high school (Completó la escuela secundaria)		$20,000 - $29,999	4130 Beran Dr Houston TX 77045	Complete	Spanish (Español)	Yes
13729	Hispanic (Hispana)	No	Central American Country (País centroamericano)	Completed high school (Completó la escuela secundaria)		$10,000 - $19,999	5625 Antoine Dr Apt 1210 Houston TX 77091	Complete	Spanish (Español)	Yes
11330	Hispanic (Hispana)	No	México (México)	Completed elementary school (Completó la escuela primaria)		<$10,000	7400 Plum Creek Dr Apt 2511 Houston TX 77012	Complete	Spanish (Español)	Yes
13093	Hispanic (Hispana)	No	México (México)	Some years of high school (Algunos años de escuela secundaria)		<$10,000	304 Georgia St South Houston TX 77587	Complete	Spanish (Español)	Yes
11173	Hispanic (Hispana)	No	México (México)	Some years of college/vocational school (Algunos años de Universidad o la Escuela Politécnica)		$10,000 - $19,999	520 Gulf Bank Trl 66 Houston TX 77037	Complete	Spanish (Español)	Yes
12525	Hispanic (Hispana)	No	México (México)	Completed high school (Completó la escuela secundaria)		$20,000 - $29,999	8602 Valley Forest Dr Houston TX 77078	Complete	Spanish (Español)	Yes
13461	Hispanic (Hispana)	No	México (México)	Completed high school (Completó la escuela secundaria)		$30,000 - $39,999	15623 Kipplans Bend Dr Houston TX 77014	Complete	Spanish (Español)	Yes
12502	Hispanic (Hispana)	No	México (México)	Completed high school (Completó la escuela secundaria)		$20,000 - $29,999	5839 Birchmont Dr Houston TX 77092	Complete	Spanish (Español)	Yes
11690	Hispanic (Hispana)	No	México (México)	Never went to school (Nunca fué a la escuela)		<$10,000	7710 Southern St Houston TX 77087	Complete	Spanish (Español)	Yes
13410	Hispanic (Hispana)	No	Central American Country (País centroamericano)	Completed elementary school (Completó la escuela primaria)		<$10,000	20014 Imperial Stump Houston TX 77073	Complete	Spanish (Español)	Yes
7277	Hispanic (Hispana)	No	Central American Country (País centroamericano)	Some years of high school (Algunos años de escuela secundaria)		$10,000 - $19,999	1200 Northwood St Apt 1001 Houston TX 77521	Complete	Spanish (Español)	Yes
12625	Hispanic (Hispana)	No	México (México)	Some years of college/vocational school (Algunos años de Universidad o la Escuela Politécnica)		$20,000 - $29,999	660 Maxey Rd Trlr 185 Houston TX 77013	Complete	Spanish (Español)	Yes
13593	Hispanic (Hispana)	No	México (México)	Some years of high school (Algunos años de escuela secundaria)		$10,000 - $19,999	331 Hollyvale Ln Houston TX 77060	Complete	Spanish (Español)	Yes
12133	Hispanic (Hispana)	No	Central American Country (País centroamericano)	Completed elementary school (Completó la escuela primaria)		<$10,000	11505 Keegans Ridge Rd Apt 1109 Houston TX	Complete	Spanish (Español)	Yes
12635	Hispanic (Hispana)	No	México (México)	Completed high school (Completó la escuela secundaria)		$10,000 - $19,999		Complete	Spanish (Español)	Yes
6665	Hispanic (Hispana)	No	México (México)	Some years of high school (Algunos años de escuela secundaria)		$10,000 - $19,999	18355 Flint Hill Dr Katy TX 77449	Complete	Spanish (Español)	Yes
