# Supplementary material for: Perceived barriers to cervical cancer screening and motivators for at-home human papillomavirus self-sampling during the COVID-19 pandemic: Results from a telephone survey
Source: eLife journal article supplement (doi:10.7554/elife.84664), 2023-05-26
Supplement: supp [file elife_poa_e84664_Table_2_source_data_1.xls]

## Sheet: PRESTIS-CompletedSurveys_DATA_L
Record ID	Complete?	AA8. Language of interview (Idioma de entrevista)	C1e. Getting a Pap test is expensive. (Hacerse el Papanicolaou es caro.)	C1f. Getting a Pap test is embarrassing. (Hacerse el Papanicolaou es penoso.)	C1g. Getting a Pap test is uncomfortable. (Hacerse el Papanicolaou es incómodo.)	C1k. I'm uncomfortable having a provider who is a man give me a Pap test. (Me siento incómoda con un proveedor hombre que me haga la prueba de Papanicolaou.)
453	Complete	Spanish (Español)	No	Yes (Si)	Yes (Si)	Yes (Si)
702	Complete	Spanish (Español)	No	Yes (Si)	Yes (Si)	Yes (Si)
2055	Complete	English (Ingles)	No	Yes (Si)	Yes (Si)	Yes (Si)
358	Complete	Spanish (Español)	No	Yes (Si)	Yes (Si)	No
412	Complete	Spanish (Español)	No	Yes (Si)	Yes (Si)	No
322	Complete	English (Ingles)	No	No	No	No
152	Complete	Spanish (Español)	Yes (Si)	Yes (Si)	Yes (Si)	No
1204	Complete	Spanish (Español)	Unsure (No estoy segura)	Yes (Si)	Yes (Si)	Yes (Si)
1436	Complete	English (Ingles)	No	No	No	Yes (Si)
469	Complete	English (Ingles)	No	No	Yes (Si)	No
922	Complete	English (Ingles)	No	No	No	Yes (Si)
973	Complete	English (Ingles)	No	No	Yes (Si)	No
2514	Complete	English (Ingles)	No	No	Yes (Si)	No
991	Complete	Spanish (Español)	Unsure (No estoy segura)	Yes (Si)	Yes (Si)	Yes (Si)
1526	Complete	English (Ingles)	No	No	No	No
1745	Complete	English (Ingles)	No	Yes (Si)	No	No
2215	Complete	English (Ingles)	No	No	Yes (Si)	Yes (Si)
2621	Complete	Spanish (Español)	No	Yes (Si)	Yes (Si)	Yes (Si)
2663	Complete	Spanish (Español)	No	Yes (Si)	Yes (Si)	No
2740	Complete	English (Ingles)	No	Yes (Si)	Yes (Si)	Yes (Si)
1718	Complete	Spanish (Español)	No	Yes (Si)	Yes (Si)	Yes (Si)
277	Complete	Spanish (Español)	Yes (Si)	No	Yes (Si)	Yes (Si)
2004	Complete	Spanish (Español)	No	Yes (Si)	Yes (Si)	Yes (Si)
2330	Complete	Spanish (Español)	No	Yes (Si)	No	Yes (Si)
2378	Complete	English (Ingles)	No	Yes (Si)	Yes (Si)	No
2541	Complete	English (Ingles)	Unsure (No estoy segura)	Yes (Si)	Yes (Si)	Yes (Si)
1796	Complete	Spanish (Español)	Yes (Si)	Yes (Si)	Yes (Si)	Yes (Si)
2490	Complete	Spanish (Español)	No	Yes (Si)	Yes (Si)	Yes (Si)
1100	Complete	English (Ingles)	No	Yes (Si)	Yes (Si)	Yes (Si)
2529	Complete	Spanish (Español)	Unsure (No estoy segura)	Yes (Si)	Yes (Si)	Yes (Si)
2651	Complete	Spanish (Español)	No	Yes (Si)	Yes (Si)	Yes (Si)
2082	Complete	Spanish (Español)	Yes (Si)	Yes (Si)	Yes (Si)	Yes (Si)
2683	Complete	Spanish (Español)	No	No	No	No
2876	Complete	Spanish (Español)	Unsure (No estoy segura)	No	Yes (Si)	Yes (Si)
402	Complete	Spanish (Español)	Yes (Si)	Yes (Si)	Yes (Si)	Yes (Si)
655	Complete	English (Ingles)	No	Yes (Si)	Yes (Si)	No
3226	Complete	Spanish (Español)	Unsure (No estoy segura)	No	Yes (Si)	Yes (Si)
2059	Complete	Spanish (Español)	No	Yes (Si)	No	No
3051	Complete	Spanish (Español)	Yes (Si)	Yes (Si)	Yes (Si)	Yes (Si)
230	Complete	English (Ingles)	Yes (Si)	No	Yes (Si)	Yes (Si)
3057	Complete	Spanish (Español)	Unsure (No estoy segura)	No	Yes (Si)	No
3358	Complete	Spanish (Español)	No	No	No	Yes (Si)
3499	Complete	English (Ingles)	No	Unsure (No estoy segura)	Yes (Si)	Yes (Si)
3065	Complete	English (Ingles)	No	No	No	Yes (Si)
3380	Complete	English (Ingles)	No	No	Yes (Si)	Yes (Si)
3614	Complete	English (Ingles)	Unsure (No estoy segura)	Unsure (No estoy segura)	Yes (Si)	Yes (Si)
3868	Complete	Spanish (Español)	No	Yes (Si)	Yes (Si)	Yes (Si)
4033	Complete	Spanish (Español)	No	Yes (Si)	Yes (Si)	No
4036	Complete	Spanish (Español)	Yes (Si)	Yes (Si)	No	No
3618	Complete	Spanish (Español)	Yes (Si)	Yes (Si)	Yes (Si)	Yes (Si)
3647	Complete	Spanish (Español)	No	No	No	No
3604	Complete	Spanish (Español)	No	No	No	No
3621	Complete	Spanish (Español)	Yes (Si)	No	No	Yes (Si)
4240	Complete	English (Ingles)	Yes (Si)	No	Yes (Si)	No
3644	Complete	Spanish (Español)	Yes (Si)	Yes (Si)	No	Yes (Si)
4063	Complete	Spanish (Español)	Yes (Si)	Yes (Si)	Yes (Si)	Yes (Si)
3671	Complete	Spanish (Español)	No	Yes (Si)	Yes (Si)	Yes (Si)
3387	Complete	Spanish (Español)	Yes (Si)	Yes (Si)	Yes (Si)	Yes (Si)
3606	Complete	Spanish (Español)	No	Yes (Si)	Yes (Si)	Yes (Si)
4886	Complete	Spanish (Español)	Yes (Si)	Yes (Si)	Yes (Si)	Yes (Si)
4895	Complete	English (Ingles)	Unsure (No estoy segura)	No	Yes (Si)	No
4392	Complete	English (Ingles)	Unsure (No estoy segura)	No	No	No
4553	Complete	Spanish (Español)	No	No	Yes (Si)	No
4600	Complete	Spanish (Español)	Yes (Si)	Yes (Si)	Yes (Si)	Yes (Si)
4424	Complete	English (Ingles)	No	Yes (Si)	Yes (Si)	Yes (Si)
4723	Complete	English (Ingles)	No	No	No	Yes (Si)
4403	Complete	Spanish (Español)	Yes (Si)	Yes (Si)	Yes (Si)	Yes (Si)
4539	Complete	English (Ingles)	No	No	No	No
4442	Complete	English (Ingles)	No	No	Yes (Si)	Yes (Si)
4774	Complete	English (Ingles)	No	Yes (Si)	Yes (Si)	Yes (Si)
5139	Complete	Spanish (Español)	No	Yes (Si)	No	Yes (Si)
5212	Complete	Spanish (Español)	No	Yes (Si)	Yes (Si)	Yes (Si)
5202	Complete	Spanish (Español)	Yes (Si)	Yes (Si)	Yes (Si)	Yes (Si)
5371	Complete	English (Ingles)	No	No	No	Yes (Si)
4802	Complete	English (Ingles)	Yes (Si)	No	Yes (Si)	Yes (Si)
5245	Complete	Spanish (Español)	No	No	Yes (Si)	Yes (Si)
5352	Complete	Spanish (Español)	Yes (Si)	Yes (Si)	Yes (Si)	Yes (Si)
4460	Complete	English (Ingles)	No	Yes (Si)	Yes (Si)	Yes (Si)
5016	Complete	English (Ingles)	No	No	No	Yes (Si)
5129	Complete	English (Ingles)	No	No	No	No
4443	Complete	Spanish (Español)	Unsure (No estoy segura)	No	No	Yes (Si)
4468	Complete	Spanish (Español)	No	No	No	Yes (Si)
4480	Complete	Spanish (Español)	Yes (Si)	Yes (Si)	Yes (Si)	Yes (Si)
4794	Complete	English (Ingles)	No	Yes (Si)	Yes (Si)	Yes (Si)
4983	Complete	English (Ingles)	Unsure (No estoy segura)	No	No	Yes (Si)
5420	Complete	Spanish (Español)	No	Yes (Si)	Yes (Si)	Unsure (No estoy segura)
5303	Complete	Spanish (Español)	No	No	Yes (Si)	Yes (Si)
5512	Complete	English (Ingles)	No	No	Yes (Si)	No
5534	Complete	English (Ingles)	No	Yes (Si)	Yes (Si)	Yes (Si)
5623	Complete	English (Ingles)	No	Yes (Si)	Yes (Si)	No
5937	Complete	Spanish (Español)	Yes (Si)	Yes (Si)	Yes (Si)	Yes (Si)
5671	Complete	English (Ingles)	Unsure (No estoy segura)	Yes (Si)	Yes (Si)	Yes (Si)
5820	Complete	Spanish (Español)	Unsure (No estoy segura)	Yes (Si)	No	Yes (Si)
5932	Complete	English (Ingles)	No	No	No	No
5621	Complete	Spanish (Español)	Yes (Si)	Yes (Si)	Yes (Si)	Yes (Si)
5811	Complete	Spanish (Español)	No	No	Yes (Si)	No
5848	Complete	Spanish (Español)	Yes (Si)	No	No	No
5694	Complete	Spanish (Español)	Yes (Si)	No	No	No
4967	Complete	Spanish (Español)	Yes (Si)	Yes (Si)	Yes (Si)	Yes (Si)
5393	Complete	Spanish (Español)	Yes (Si)	Yes (Si)	Yes (Si)	Yes (Si)
4930	Complete	Spanish (Español)	No	No	No	No
5577	Complete	Spanish (Español)	No	Yes (Si)	Yes (Si)	Yes (Si)
6089	Complete	Spanish (Español)	No	No	Yes (Si)	Yes (Si)
6291	Complete	Spanish (Español)	No	No	No	No
6420	Complete	Spanish (Español)	No	Yes (Si)	No	Yes (Si)
6356	Complete	English (Ingles)	Unsure (No estoy segura)	No	Yes (Si)	Yes (Si)
6215	Complete	English (Ingles)	No	No	No	No
6448	Complete	English (Ingles)	No	No	No	No
6720	Complete	Spanish (Español)	No	No	Yes (Si)	Yes (Si)
5775	Complete	Spanish (Español)	No	Yes (Si)	Yes (Si)	Yes (Si)
6816	Complete	Spanish (Español)	No	Yes (Si)	Yes (Si)	No
5766	Complete	English (Ingles)	Unsure (No estoy segura)	Yes (Si)	Yes (Si)	Yes (Si)
6021	Complete	Spanish (Español)	No	No	Yes (Si)	No
6268	Complete	Spanish (Español)	Yes (Si)	Yes (Si)	Yes (Si)	Yes (Si)
6929	Complete	Spanish (Español)	No	No	No	No
7224	Complete	Spanish (Español)	No	Yes (Si)	Yes (Si)	Yes (Si)
6286	Complete	Spanish (Español)	No	Yes (Si)	Yes (Si)	Yes (Si)
5490	Complete	Spanish (Español)	Yes (Si)	Yes (Si)	Yes (Si)	Yes (Si)
6288	Complete	Spanish (Español)	Yes (Si)	Yes (Si)	Yes (Si)	Yes (Si)
6097	Complete	Spanish (Español)	No	No	No	Yes (Si)
5874	Complete	English (Ingles)	No	Yes (Si)	Yes (Si)	Yes (Si)
5085	Complete	Spanish (Español)	No	Yes (Si)	Yes (Si)	Yes (Si)
6770	Complete	Spanish (Español)	No	No	No	No
5724	Complete	English (Ingles)	No	No	Yes (Si)	No
6550	Complete	English (Ingles)	No	Yes (Si)	Yes (Si)	No
7239	Complete	Spanish (Español)	No	No	No	No
7425	Complete	Spanish (Español)	Yes (Si)	Yes (Si)	Yes (Si)	Yes (Si)
7934	Complete	Spanish (Español)	Yes (Si)	Yes (Si)	Yes (Si)	Yes (Si)
7279	Complete	Spanish (Español)	No	No	No	Yes (Si)
7935	Complete	Spanish (Español)	No	No	Yes (Si)	Yes (Si)
7314	Complete	English (Ingles)	No	No	No	No
7594	Complete	English (Ingles)	No	No	Yes (Si)	No
2288	Complete	English (Ingles)	No	Yes (Si)	Yes (Si)	Yes (Si)
7148	Complete	Spanish (Español)	No	Yes (Si)	Yes (Si)	Yes (Si)
7062	Complete	English (Ingles)	Unsure (No estoy segura)	No	Yes (Si)	No
7648	Complete	English (Ingles)	No	No	Yes (Si)	Yes (Si)
7064	Complete	Spanish (Español)	No	Yes (Si)	No	Yes (Si)
8312	Complete	Spanish (Español)	Yes (Si)	Yes (Si)	Yes (Si)	No
6085	Complete	Spanish (Español)	No	Yes (Si)	Yes (Si)	Yes (Si)
7323	Complete	Spanish (Español)	No	Yes (Si)	No	Yes (Si)
7243	Complete	Spanish (Español)	No	Yes (Si)	No	Yes (Si)
2300	Complete	English (Ingles)	No	No	No	No
7555	Complete	Spanish (Español)	No	Yes (Si)	No	Yes (Si)
7123	Complete	Spanish (Español)	Unsure (No estoy segura)	Yes (Si)	Yes (Si)	Yes (Si)
6342	Complete	Spanish (Español)	No	No	Yes (Si)	No
6592	Complete	English (Ingles)	Unsure (No estoy segura)	No	No	No
7677	Complete	Spanish (Español)	No	Yes (Si)	No	Yes (Si)
6633	Complete	Spanish (Español)	No	No	Yes (Si)	Yes (Si)
7320	Complete	English (Ingles)	Yes (Si)	Yes (Si)	Yes (Si)	No
8307	Complete	Spanish (Español)	No	Yes (Si)	Yes (Si)	Yes (Si)
7121	Complete	Spanish (Español)	No	Yes (Si)	Yes (Si)	No
8680	Complete	Spanish (Español)	No	No	No	No
6548	Complete	English (Ingles)	No	No	Yes (Si)	No
7788	Complete	Spanish (Español)	No	No	No	Yes (Si)
8026	Complete	Spanish (Español)	No	Yes (Si)	Yes (Si)	Unsure (No estoy segura)
8901	Complete	Spanish (Español)	No	Yes (Si)	Yes (Si)	Yes (Si)
5901	Complete	English (Ingles)	Yes (Si)	No	Yes (Si)	No
6436	Complete	English (Ingles)	No	No	Yes (Si)	No
9854	Complete	Spanish (Español)	No	Yes (Si)	Yes (Si)	Yes (Si)
8550	Complete	Spanish (Español)	Yes (Si)	Yes (Si)	Yes (Si)	Yes (Si)
6799	Complete	English (Ingles)	No	No	Yes (Si)	Yes (Si)
8952	Complete	Spanish (Español)	No	Yes (Si)	Yes (Si)	Yes (Si)
9809	Complete	Spanish (Español)	No	Yes (Si)	Yes (Si)	No
10035	Complete	Spanish (Español)	No	No	No	No
7827	Complete	English (Ingles)	No	Yes (Si)	Yes (Si)	Yes (Si)
6304	Complete	English (Ingles)	Yes (Si)	No	Yes (Si)	Yes (Si)
7930	Complete	English (Ingles)	No	No	No	No
8815	Complete	Spanish (Español)	No	No	Yes (Si)	No
8986	Complete	Spanish (Español)	Yes (Si)	Yes (Si)	Yes (Si)	No
8062	Complete	Spanish (Español)	Yes (Si)	No	No	Yes (Si)
8055	Complete	English (Ingles)	Yes (Si)	No	No	No
8698	Complete	English (Ingles)	No	No	No	Yes (Si)
9532	Complete	Spanish (Español)	No	No	Yes (Si)	Yes (Si)
7746	Complete	Spanish (Español)	No	No	No	Yes (Si)
8682	Complete	Spanish (Español)	Yes (Si)	Yes (Si)	Yes (Si)	Yes (Si)
8774	Complete	Spanish (Español)	Yes (Si)	Yes (Si)	Yes (Si)	Yes (Si)
8248	Complete	English (Ingles)	Yes (Si)	No	Yes (Si)	No
8604	Complete	English (Ingles)	Yes (Si)	Yes (Si)	Yes (Si)	Yes (Si)
8001	Complete	English (Ingles)	No	Yes (Si)	Yes (Si)	Yes (Si)
10059	Complete	Spanish (Español)	Unsure (No estoy segura)	Yes (Si)	Yes (Si)	Yes (Si)
10455	Complete	Spanish (Español)	No	Yes (Si)	Yes (Si)	Yes (Si)
10273	Complete	Spanish (Español)	No	Yes (Si)	No	Yes (Si)
9749	Complete	Spanish (Español)	No	No	No	No
8161	Complete	English (Ingles)	No	No	Yes (Si)	No
9713	Complete	Spanish (Español)	No	No	Yes (Si)	Yes (Si)
9446	Complete	English (Ingles)	No	Yes (Si)	Yes (Si)	Yes (Si)
8896	Complete	English (Ingles)	No	No	No	No
10200	Complete	Spanish (Español)	No	No	Yes (Si)	No
10272	Complete	English (Ingles)	No	Yes (Si)	Yes (Si)	Yes (Si)
9576	Complete	English (Ingles)	No	No	No	Yes (Si)
8797	Complete	English (Ingles)	No	Yes (Si)	Yes (Si)	Yes (Si)
10116	Complete	English (Ingles)	No	No	No	No
10249	Complete	Spanish (Español)	No	No	No	No
10457	Complete	English (Ingles)	No	No	No	Yes (Si)
13260	Complete	English (Ingles)	No	No	No	No
9702	Complete	English (Ingles)	Unsure (No estoy segura)	No	No	No
10630	Complete	English (Ingles)	Unsure (No estoy segura)	No	Yes (Si)	Yes (Si)
10760	Complete	Spanish (Español)	No	No	No	No
10808	Complete	Spanish (Español)	No	Yes (Si)	Yes (Si)	Yes (Si)
11073	Complete	English (Ingles)	Yes (Si)	Yes (Si)	Yes (Si)	No
11482	Complete	Spanish (Español)	No	No	No	No
10517	Complete	English (Ingles)	No	No	No	No
10675	Complete	Spanish (Español)	Yes (Si)	Yes (Si)	Yes (Si)	Yes (Si)
14069	Complete	English (Ingles)	No	No	No	No
10557	Complete	English (Ingles)	No	No	Yes (Si)	Yes (Si)
13273	Complete	Spanish (Español)	No	No	Yes (Si)	Yes (Si)
11430	Complete	English (Ingles)	No	No	Unsure (No estoy segura)	No
11098	Complete	English (Ingles)	Yes (Si)	No	No	No
11391	Complete	Spanish (Español)	Unsure (No estoy segura)	Yes (Si)	Yes (Si)	No
12009	Complete	English (Ingles)	No	No	Yes (Si)	Yes (Si)
12116	Complete	English (Ingles)	No	No	No	Yes (Si)
11299	Complete	English (Ingles)	Unsure (No estoy segura)	No	Yes (Si)	Yes (Si)
11446	Complete	English (Ingles)	Unsure (No estoy segura)	No	No	No
11677	Complete	English (Ingles)	No	No	Yes (Si)	Yes (Si)
11969	Complete	English (Ingles)	No	Yes (Si)	Yes (Si)	Yes (Si)
12196	Complete	Spanish (Español)		Yes (Si)	Yes (Si)	Yes (Si)
13253	Complete	Spanish (Español)	No	Yes (Si)	Yes (Si)	Yes (Si)
13305	Complete	Spanish (Español)	No	Yes (Si)	Yes (Si)	Yes (Si)
13729	Complete	Spanish (Español)	No	Yes (Si)	Yes (Si)	Yes (Si)
11330	Complete	Spanish (Español)	No	No	No	Yes (Si)
13093	Complete	Spanish (Español)	No	Yes (Si)	Yes (Si)	Yes (Si)
11173	Complete	Spanish (Español)	No	Yes (Si)	Yes (Si)	No
12525	Complete	Spanish (Español)	No	No	No	No
13461	Complete	Spanish (Español)	No	Yes (Si)	Yes (Si)	Yes (Si)
12502	Complete	Spanish (Español)	No	Yes (Si)	Yes (Si)	Yes (Si)
11690	Complete	Spanish (Español)	No	Yes (Si)	Yes (Si)	Yes (Si)
13410	Complete	Spanish (Español)	No	No	Yes (Si)	No
7277	Complete	Spanish (Español)	Unsure (No estoy segura)	Yes (Si)	Yes (Si)	Yes (Si)
12625	Complete	Spanish (Español)	No	Yes (Si)	Yes (Si)	Yes (Si)
13593	Complete	Spanish (Español)	No	Yes (Si)	Yes (Si)	No
12133	Complete	Spanish (Español)	No	Yes (Si)	Yes (Si)	Yes (Si)
12635	Complete	Spanish (Español)	No	No	No	No
6665	Complete	Spanish (Español)	No	Yes (Si)	Yes (Si)	Yes (Si)
