# Supplementary material for: Perceived barriers to cervical cancer screening and motivators for at-home human papillomavirus self-sampling during the COVID-19 pandemic: Results from a telephone survey
Source: eLife journal article supplement (doi:10.7554/elife.84664), 2023-05-26
Supplement: supp [file elife_poa_e84664_Table_3_source_data_1.xls]

## Sheet: PRESTIS-CompletedSurveys_DATA_L
Record ID	E9. Compared with getting a Pap test at a clinic, how would you rate the convenience of the self-sampling kit? (En comparación con hacerse el Papanicolaou en la clínica, ¿qué tan conveniente es usar el kit de auto-examen? Diría que…)	E10. Compared with getting a Pap test at a clinic, how embarrassing is it to use the self-sampling kit? (En comparación con hacerse el Papanicolaou en la clínica, ¿qué tan vergonzoso es usar el kit de auto-examen?)	E11. Compared to getting a Pap test at a clinic, how much stress/anxiety did you feel using the self-sampling kit? (En comparación con hacerse el Papanicolaou en la clínica, ¿cuánto estrés / ansiedad sintió al usar el kit de auto-examen?)	Complete?	AA8. Language of interview (Idioma de entrevista)
453	Both are about the same (Ambos son casi iguales)	Getting a Pap test at a clinic is more embarrassing (Hacerse el Papanicolaou en la clínica es más vergonzoso)	Getting a Pap test at a clinic makes me more stressed/anxious (Hacerse el Papanicolaou en la clínica me causa más estrés/ansiedad)	Complete	Spanish (Español)
702	Using the self-sampling kit is more convenient (Usar el kit de auto-examen es más conveniente)	Getting a Pap test at a clinic is more embarrassing (Hacerse el Papanicolaou en la clínica es más vergonzoso)	Getting a Pap test at a clinic makes me more stressed/anxious (Hacerse el Papanicolaou en la clínica me causa más estrés/ansiedad)	Complete	Spanish (Español)
2055	Using the self-sampling kit is more convenient (Usar el kit de auto-examen es más conveniente)	Both are about the same (Ambos son casi iguales)	Both are about the same (Ambos son casi iguales)	Complete	English (Ingles)
358	Using the self-sampling kit is more convenient (Usar el kit de auto-examen es más conveniente)	Getting a Pap test at a clinic is more embarrassing (Hacerse el Papanicolaou en la clínica es más vergonzoso)	Getting a Pap test at a clinic makes me more stressed/anxious (Hacerse el Papanicolaou en la clínica me causa más estrés/ansiedad)	Complete	Spanish (Español)
412				Complete	Spanish (Español)
322	Both are about the same (Ambos son casi iguales)	Both are about the same (Ambos son casi iguales)	Both are about the same (Ambos son casi iguales)	Complete	English (Ingles)
152	Using the self-sampling kit is more convenient (Usar el kit de auto-examen es más conveniente)	Both are about the same (Ambos son casi iguales)	Getting a Pap test at a clinic makes me more stressed/anxious (Hacerse el Papanicolaou en la clínica me causa más estrés/ansiedad)	Complete	Spanish (Español)
1204	Getting a Pap test at a clinic is more convenient (Hacerme el Papanicolaou en la clínica es más conveniente)	Getting a Pap test at a clinic is more embarrassing (Hacerse el Papanicolaou en la clínica es más vergonzoso)	Using the self-sampling kit makes me more stressed/anxious (Usar el kit de auto-examen me causa más estrés/ansiedad)	Complete	Spanish (Español)
1436	Using the self-sampling kit is more convenient (Usar el kit de auto-examen es más conveniente)	Getting a Pap test at a clinic is more embarrassing (Hacerse el Papanicolaou en la clínica es más vergonzoso)	Getting a Pap test at a clinic makes me more stressed/anxious (Hacerse el Papanicolaou en la clínica me causa más estrés/ansiedad)	Complete	English (Ingles)
469	Using the self-sampling kit is more convenient (Usar el kit de auto-examen es más conveniente)	Both are about the same (Ambos son casi iguales)	Both are about the same (Ambos son casi iguales)	Complete	English (Ingles)
922	Using the self-sampling kit is more convenient (Usar el kit de auto-examen es más conveniente)	Getting a Pap test at a clinic is more embarrassing (Hacerse el Papanicolaou en la clínica es más vergonzoso)	Getting a Pap test at a clinic makes me more stressed/anxious (Hacerse el Papanicolaou en la clínica me causa más estrés/ansiedad)	Complete	English (Ingles)
973				Complete	English (Ingles)
2514	Using the self-sampling kit is more convenient (Usar el kit de auto-examen es más conveniente)	Getting a Pap test at a clinic is more embarrassing (Hacerse el Papanicolaou en la clínica es más vergonzoso)	Both are about the same (Ambos son casi iguales)	Complete	English (Ingles)
991				Complete	Spanish (Español)
1526				Complete	English (Ingles)
1745	Both are about the same (Ambos son casi iguales)	Getting a Pap test at a clinic is more embarrassing (Hacerse el Papanicolaou en la clínica es más vergonzoso)	Getting a Pap test at a clinic makes me more stressed/anxious (Hacerse el Papanicolaou en la clínica me causa más estrés/ansiedad)	Complete	English (Ingles)
2215	Both are about the same (Ambos son casi iguales)	Both are about the same (Ambos son casi iguales)	Both are about the same (Ambos son casi iguales)	Complete	English (Ingles)
2621	Using the self-sampling kit is more convenient (Usar el kit de auto-examen es más conveniente)	Getting a Pap test at a clinic is more embarrassing (Hacerse el Papanicolaou en la clínica es más vergonzoso)	Using the self-sampling kit makes me more stressed/anxious (Usar el kit de auto-examen me causa más estrés/ansiedad)	Complete	Spanish (Español)
2663	Both are about the same (Ambos son casi iguales)	Getting a Pap test at a clinic is more embarrassing (Hacerse el Papanicolaou en la clínica es más vergonzoso)	Both are about the same (Ambos son casi iguales)	Complete	Spanish (Español)
2740	Using the self-sampling kit is more convenient (Usar el kit de auto-examen es más conveniente)	Getting a Pap test at a clinic is more embarrassing (Hacerse el Papanicolaou en la clínica es más vergonzoso)	Getting a Pap test at a clinic makes me more stressed/anxious (Hacerse el Papanicolaou en la clínica me causa más estrés/ansiedad)	Complete	English (Ingles)
1718	Both are about the same (Ambos son casi iguales)	Getting a Pap test at a clinic is more embarrassing (Hacerse el Papanicolaou en la clínica es más vergonzoso)	Getting a Pap test at a clinic makes me more stressed/anxious (Hacerse el Papanicolaou en la clínica me causa más estrés/ansiedad)	Complete	Spanish (Español)
277	Getting a Pap test at a clinic is more convenient (Hacerme el Papanicolaou en la clínica es más conveniente)	Both are about the same (Ambos son casi iguales)	Using the self-sampling kit makes me more stressed/anxious (Usar el kit de auto-examen me causa más estrés/ansiedad)	Complete	Spanish (Español)
2004				Complete	Spanish (Español)
2330	Both are about the same (Ambos son casi iguales)	Getting a Pap test at a clinic is more embarrassing (Hacerse el Papanicolaou en la clínica es más vergonzoso)	Getting a Pap test at a clinic makes me more stressed/anxious (Hacerse el Papanicolaou en la clínica me causa más estrés/ansiedad)	Complete	Spanish (Español)
2378	Getting a Pap test at a clinic is more convenient (Hacerme el Papanicolaou en la clínica es más conveniente)	Getting a Pap test at a clinic is more embarrassing (Hacerse el Papanicolaou en la clínica es más vergonzoso)	Getting a Pap test at a clinic makes me more stressed/anxious (Hacerse el Papanicolaou en la clínica me causa más estrés/ansiedad)	Complete	English (Ingles)
2541	Using the self-sampling kit is more convenient (Usar el kit de auto-examen es más conveniente)	Getting a Pap test at a clinic is more embarrassing (Hacerse el Papanicolaou en la clínica es más vergonzoso)	Getting a Pap test at a clinic makes me more stressed/anxious (Hacerse el Papanicolaou en la clínica me causa más estrés/ansiedad)	Complete	English (Ingles)
1796				Complete	Spanish (Español)
2490	Using the self-sampling kit is more convenient (Usar el kit de auto-examen es más conveniente)	Getting a Pap test at a clinic is more embarrassing (Hacerse el Papanicolaou en la clínica es más vergonzoso)	Getting a Pap test at a clinic makes me more stressed/anxious (Hacerse el Papanicolaou en la clínica me causa más estrés/ansiedad)	Complete	Spanish (Español)
1100	Using the self-sampling kit is more convenient (Usar el kit de auto-examen es más conveniente)	Getting a Pap test at a clinic is more embarrassing (Hacerse el Papanicolaou en la clínica es más vergonzoso)	Getting a Pap test at a clinic makes me more stressed/anxious (Hacerse el Papanicolaou en la clínica me causa más estrés/ansiedad)	Complete	English (Ingles)
2529	Both are about the same (Ambos son casi iguales)	Both are about the same (Ambos son casi iguales)	Both are about the same (Ambos son casi iguales)	Complete	Spanish (Español)
2651	Using the self-sampling kit is more convenient (Usar el kit de auto-examen es más conveniente)	Getting a Pap test at a clinic is more embarrassing (Hacerse el Papanicolaou en la clínica es más vergonzoso)	Getting a Pap test at a clinic makes me more stressed/anxious (Hacerse el Papanicolaou en la clínica me causa más estrés/ansiedad)	Complete	Spanish (Español)
2082	Using the self-sampling kit is more convenient (Usar el kit de auto-examen es más conveniente)	Getting a Pap test at a clinic is more embarrassing (Hacerse el Papanicolaou en la clínica es más vergonzoso)	Both are about the same (Ambos son casi iguales)	Complete	Spanish (Español)
2683	Using the self-sampling kit is more convenient (Usar el kit de auto-examen es más conveniente)	Both are about the same (Ambos son casi iguales)	Both are about the same (Ambos son casi iguales)	Complete	Spanish (Español)
2876				Complete	Spanish (Español)
402				Complete	Spanish (Español)
655	Using the self-sampling kit is more convenient (Usar el kit de auto-examen es más conveniente)	Getting a Pap test at a clinic is more embarrassing (Hacerse el Papanicolaou en la clínica es más vergonzoso)	Getting a Pap test at a clinic makes me more stressed/anxious (Hacerse el Papanicolaou en la clínica me causa más estrés/ansiedad)	Complete	English (Ingles)
3226	Both are about the same (Ambos son casi iguales)	Both are about the same (Ambos son casi iguales)	Both are about the same (Ambos son casi iguales)	Complete	Spanish (Español)
2059				Complete	Spanish (Español)
3051	Both are about the same (Ambos son casi iguales)	Getting a Pap test at a clinic is more embarrassing (Hacerse el Papanicolaou en la clínica es más vergonzoso)	Getting a Pap test at a clinic makes me more stressed/anxious (Hacerse el Papanicolaou en la clínica me causa más estrés/ansiedad)	Complete	Spanish (Español)
230	Both are about the same (Ambos son casi iguales)	Both are about the same (Ambos son casi iguales)	Getting a Pap test at a clinic makes me more stressed/anxious (Hacerse el Papanicolaou en la clínica me causa más estrés/ansiedad)	Complete	English (Ingles)
3057	Using the self-sampling kit is more convenient (Usar el kit de auto-examen es más conveniente)	Getting a Pap test at a clinic is more embarrassing (Hacerse el Papanicolaou en la clínica es más vergonzoso)	Getting a Pap test at a clinic makes me more stressed/anxious (Hacerse el Papanicolaou en la clínica me causa más estrés/ansiedad)	Complete	Spanish (Español)
3358	Both are about the same (Ambos son casi iguales)	Getting a Pap test at a clinic is more embarrassing (Hacerse el Papanicolaou en la clínica es más vergonzoso)	Getting a Pap test at a clinic makes me more stressed/anxious (Hacerse el Papanicolaou en la clínica me causa más estrés/ansiedad)	Complete	Spanish (Español)
3499				Complete	English (Ingles)
3065	Using the self-sampling kit is more convenient (Usar el kit de auto-examen es más conveniente)	Getting a Pap test at a clinic is more embarrassing (Hacerse el Papanicolaou en la clínica es más vergonzoso)	Getting a Pap test at a clinic makes me more stressed/anxious (Hacerse el Papanicolaou en la clínica me causa más estrés/ansiedad)	Complete	English (Ingles)
3380	Using the self-sampling kit is more convenient (Usar el kit de auto-examen es más conveniente)	Getting a Pap test at a clinic is more embarrassing (Hacerse el Papanicolaou en la clínica es más vergonzoso)	Both are about the same (Ambos son casi iguales)	Complete	English (Ingles)
3614				Complete	English (Ingles)
3868				Complete	Spanish (Español)
4033	Using the self-sampling kit is more convenient (Usar el kit de auto-examen es más conveniente)	Getting a Pap test at a clinic is more embarrassing (Hacerse el Papanicolaou en la clínica es más vergonzoso)	Getting a Pap test at a clinic makes me more stressed/anxious (Hacerse el Papanicolaou en la clínica me causa más estrés/ansiedad)	Complete	Spanish (Español)
4036	Using the self-sampling kit is more convenient (Usar el kit de auto-examen es más conveniente)	Getting a Pap test at a clinic is more embarrassing (Hacerse el Papanicolaou en la clínica es más vergonzoso)	Getting a Pap test at a clinic makes me more stressed/anxious (Hacerse el Papanicolaou en la clínica me causa más estrés/ansiedad)	Complete	Spanish (Español)
3618				Complete	Spanish (Español)
3647	Both are about the same (Ambos son casi iguales)	Getting a Pap test at a clinic is more embarrassing (Hacerse el Papanicolaou en la clínica es más vergonzoso)	Both are about the same (Ambos son casi iguales)	Complete	Spanish (Español)
3604	Both are about the same (Ambos son casi iguales)	Both are about the same (Ambos son casi iguales)	Both are about the same (Ambos son casi iguales)	Complete	Spanish (Español)
3621	Getting a Pap test at a clinic is more convenient (Hacerme el Papanicolaou en la clínica es más conveniente)	Both are about the same (Ambos son casi iguales)	Both are about the same (Ambos son casi iguales)	Complete	Spanish (Español)
4240				Complete	English (Ingles)
3644				Complete	Spanish (Español)
4063	Using the self-sampling kit is more convenient (Usar el kit de auto-examen es más conveniente)	Getting a Pap test at a clinic is more embarrassing (Hacerse el Papanicolaou en la clínica es más vergonzoso)	Getting a Pap test at a clinic makes me more stressed/anxious (Hacerse el Papanicolaou en la clínica me causa más estrés/ansiedad)	Complete	Spanish (Español)
3671	Using the self-sampling kit is more convenient (Usar el kit de auto-examen es más conveniente)	Both are about the same (Ambos son casi iguales)	Getting a Pap test at a clinic makes me more stressed/anxious (Hacerse el Papanicolaou en la clínica me causa más estrés/ansiedad)	Complete	Spanish (Español)
3387				Complete	Spanish (Español)
3606	Using the self-sampling kit is more convenient (Usar el kit de auto-examen es más conveniente)	Getting a Pap test at a clinic is more embarrassing (Hacerse el Papanicolaou en la clínica es más vergonzoso)	Getting a Pap test at a clinic makes me more stressed/anxious (Hacerse el Papanicolaou en la clínica me causa más estrés/ansiedad)	Complete	Spanish (Español)
4886	Both are about the same (Ambos son casi iguales)	Getting a Pap test at a clinic is more embarrassing (Hacerse el Papanicolaou en la clínica es más vergonzoso)	Getting a Pap test at a clinic makes me more stressed/anxious (Hacerse el Papanicolaou en la clínica me causa más estrés/ansiedad)	Complete	Spanish (Español)
4895	Getting a Pap test at a clinic is more convenient (Hacerme el Papanicolaou en la clínica es más conveniente)	Both are about the same (Ambos son casi iguales)	Both are about the same (Ambos son casi iguales)	Complete	English (Ingles)
4392	Using the self-sampling kit is more convenient (Usar el kit de auto-examen es más conveniente)	Both are about the same (Ambos son casi iguales)	Using the self-sampling kit makes me more stressed/anxious (Usar el kit de auto-examen me causa más estrés/ansiedad)	Complete	English (Ingles)
4553				Complete	Spanish (Español)
4600				Complete	Spanish (Español)
4424				Complete	English (Ingles)
4723				Complete	English (Ingles)
4403	Both are about the same (Ambos son casi iguales)	Getting a Pap test at a clinic is more embarrassing (Hacerse el Papanicolaou en la clínica es más vergonzoso)	Getting a Pap test at a clinic makes me more stressed/anxious (Hacerse el Papanicolaou en la clínica me causa más estrés/ansiedad)	Complete	Spanish (Español)
4539	Both are about the same (Ambos son casi iguales)	Both are about the same (Ambos son casi iguales)	Using the self-sampling kit makes me more stressed/anxious (Usar el kit de auto-examen me causa más estrés/ansiedad)	Complete	English (Ingles)
4442	Using the self-sampling kit is more convenient (Usar el kit de auto-examen es más conveniente)	Getting a Pap test at a clinic is more embarrassing (Hacerse el Papanicolaou en la clínica es más vergonzoso)	Getting a Pap test at a clinic makes me more stressed/anxious (Hacerse el Papanicolaou en la clínica me causa más estrés/ansiedad)	Complete	English (Ingles)
4774	Using the self-sampling kit is more convenient (Usar el kit de auto-examen es más conveniente)	Getting a Pap test at a clinic is more embarrassing (Hacerse el Papanicolaou en la clínica es más vergonzoso)	Getting a Pap test at a clinic makes me more stressed/anxious (Hacerse el Papanicolaou en la clínica me causa más estrés/ansiedad)	Complete	English (Ingles)
5139	Both are about the same (Ambos son casi iguales)	Getting a Pap test at a clinic is more embarrassing (Hacerse el Papanicolaou en la clínica es más vergonzoso)	Both are about the same (Ambos son casi iguales)	Complete	Spanish (Español)
5212				Complete	Spanish (Español)
5202	Both are about the same (Ambos son casi iguales)	Getting a Pap test at a clinic is more embarrassing (Hacerse el Papanicolaou en la clínica es más vergonzoso)	Both are about the same (Ambos son casi iguales)	Complete	Spanish (Español)
5371				Complete	English (Ingles)
4802	Both are about the same (Ambos son casi iguales)	Both are about the same (Ambos son casi iguales)	Both are about the same (Ambos son casi iguales)	Complete	English (Ingles)
5245				Complete	Spanish (Español)
5352	Getting a Pap test at a clinic is more convenient (Hacerme el Papanicolaou en la clínica es más conveniente)	Getting a Pap test at a clinic is more embarrassing (Hacerse el Papanicolaou en la clínica es más vergonzoso)	Getting a Pap test at a clinic makes me more stressed/anxious (Hacerse el Papanicolaou en la clínica me causa más estrés/ansiedad)	Complete	Spanish (Español)
4460				Complete	English (Ingles)
5016	Both are about the same (Ambos son casi iguales)	Getting a Pap test at a clinic is more embarrassing (Hacerse el Papanicolaou en la clínica es más vergonzoso)	Getting a Pap test at a clinic makes me more stressed/anxious (Hacerse el Papanicolaou en la clínica me causa más estrés/ansiedad)	Complete	English (Ingles)
5129				Complete	English (Ingles)
4443	Getting a Pap test at a clinic is more convenient (Hacerme el Papanicolaou en la clínica es más conveniente)	Getting a Pap test at a clinic is more embarrassing (Hacerse el Papanicolaou en la clínica es más vergonzoso)	Getting a Pap test at a clinic makes me more stressed/anxious (Hacerse el Papanicolaou en la clínica me causa más estrés/ansiedad)	Complete	Spanish (Español)
4468				Complete	Spanish (Español)
4480				Complete	Spanish (Español)
4794	Using the self-sampling kit is more convenient (Usar el kit de auto-examen es más conveniente)	Getting a Pap test at a clinic is more embarrassing (Hacerse el Papanicolaou en la clínica es más vergonzoso)	Getting a Pap test at a clinic makes me more stressed/anxious (Hacerse el Papanicolaou en la clínica me causa más estrés/ansiedad)	Complete	English (Ingles)
4983	Using the self-sampling kit is more convenient (Usar el kit de auto-examen es más conveniente)	Getting a Pap test at a clinic is more embarrassing (Hacerse el Papanicolaou en la clínica es más vergonzoso)	Getting a Pap test at a clinic makes me more stressed/anxious (Hacerse el Papanicolaou en la clínica me causa más estrés/ansiedad)	Complete	English (Ingles)
5420	Using the self-sampling kit is more convenient (Usar el kit de auto-examen es más conveniente)	Getting a Pap test at a clinic is more embarrassing (Hacerse el Papanicolaou en la clínica es más vergonzoso)	Both are about the same (Ambos son casi iguales)	Complete	Spanish (Español)
5303				Complete	Spanish (Español)
5512	Both are about the same (Ambos son casi iguales)	Both are about the same (Ambos son casi iguales)	Both are about the same (Ambos son casi iguales)	Complete	English (Ingles)
5534	Both are about the same (Ambos son casi iguales)	Getting a Pap test at a clinic is more embarrassing (Hacerse el Papanicolaou en la clínica es más vergonzoso)	Getting a Pap test at a clinic makes me more stressed/anxious (Hacerse el Papanicolaou en la clínica me causa más estrés/ansiedad)	Complete	English (Ingles)
5623	Both are about the same (Ambos son casi iguales)	Getting a Pap test at a clinic is more embarrassing (Hacerse el Papanicolaou en la clínica es más vergonzoso)	Getting a Pap test at a clinic makes me more stressed/anxious (Hacerse el Papanicolaou en la clínica me causa más estrés/ansiedad)	Complete	English (Ingles)
5937	Using the self-sampling kit is more convenient (Usar el kit de auto-examen es más conveniente)	Getting a Pap test at a clinic is more embarrassing (Hacerse el Papanicolaou en la clínica es más vergonzoso)	Getting a Pap test at a clinic makes me more stressed/anxious (Hacerse el Papanicolaou en la clínica me causa más estrés/ansiedad)	Complete	Spanish (Español)
5671				Complete	English (Ingles)
5820	Using the self-sampling kit is more convenient (Usar el kit de auto-examen es más conveniente)	Getting a Pap test at a clinic is more embarrassing (Hacerse el Papanicolaou en la clínica es más vergonzoso)	Getting a Pap test at a clinic makes me more stressed/anxious (Hacerse el Papanicolaou en la clínica me causa más estrés/ansiedad)	Complete	Spanish (Español)
5932				Complete	English (Ingles)
5621	Both are about the same (Ambos son casi iguales)	Getting a Pap test at a clinic is more embarrassing (Hacerse el Papanicolaou en la clínica es más vergonzoso)	Getting a Pap test at a clinic makes me more stressed/anxious (Hacerse el Papanicolaou en la clínica me causa más estrés/ansiedad)	Complete	Spanish (Español)
5811				Complete	Spanish (Español)
5848	Both are about the same (Ambos son casi iguales)	Both are about the same (Ambos son casi iguales)	Both are about the same (Ambos son casi iguales)	Complete	Spanish (Español)
5694	Getting a Pap test at a clinic is more convenient (Hacerme el Papanicolaou en la clínica es más conveniente)	Getting a Pap test at a clinic is more embarrassing (Hacerse el Papanicolaou en la clínica es más vergonzoso)	Getting a Pap test at a clinic makes me more stressed/anxious (Hacerse el Papanicolaou en la clínica me causa más estrés/ansiedad)	Complete	Spanish (Español)
4967				Complete	Spanish (Español)
5393				Complete	Spanish (Español)
4930	Both are about the same (Ambos son casi iguales)	Getting a Pap test at a clinic is more embarrassing (Hacerse el Papanicolaou en la clínica es más vergonzoso)	Both are about the same (Ambos son casi iguales)	Complete	Spanish (Español)
5577	Using the self-sampling kit is more convenient (Usar el kit de auto-examen es más conveniente)	Both are about the same (Ambos son casi iguales)	Both are about the same (Ambos son casi iguales)	Complete	Spanish (Español)
6089				Complete	Spanish (Español)
6291				Complete	Spanish (Español)
6420				Complete	Spanish (Español)
6356				Complete	English (Ingles)
6215	Using the self-sampling kit is more convenient (Usar el kit de auto-examen es más conveniente)	Both are about the same (Ambos son casi iguales)	Both are about the same (Ambos son casi iguales)	Complete	English (Ingles)
6448	Using the self-sampling kit is more convenient (Usar el kit de auto-examen es más conveniente)	Both are about the same (Ambos son casi iguales)	Both are about the same (Ambos son casi iguales)	Complete	English (Ingles)
6720	Both are about the same (Ambos son casi iguales)	Getting a Pap test at a clinic is more embarrassing (Hacerse el Papanicolaou en la clínica es más vergonzoso)	Using the self-sampling kit makes me more stressed/anxious (Usar el kit de auto-examen me causa más estrés/ansiedad)	Complete	Spanish (Español)
5775	Using the self-sampling kit is more convenient (Usar el kit de auto-examen es más conveniente)	Getting a Pap test at a clinic is more embarrassing (Hacerse el Papanicolaou en la clínica es más vergonzoso)	Getting a Pap test at a clinic makes me more stressed/anxious (Hacerse el Papanicolaou en la clínica me causa más estrés/ansiedad)	Complete	Spanish (Español)
6816	Using the self-sampling kit is more convenient (Usar el kit de auto-examen es más conveniente)	Getting a Pap test at a clinic is more embarrassing (Hacerse el Papanicolaou en la clínica es más vergonzoso)	Getting a Pap test at a clinic makes me more stressed/anxious (Hacerse el Papanicolaou en la clínica me causa más estrés/ansiedad)	Complete	Spanish (Español)
5766				Complete	English (Ingles)
6021				Complete	Spanish (Español)
6268	Getting a Pap test at a clinic is more convenient (Hacerme el Papanicolaou en la clínica es más conveniente)	Getting a Pap test at a clinic is more embarrassing (Hacerse el Papanicolaou en la clínica es más vergonzoso)	Getting a Pap test at a clinic makes me more stressed/anxious (Hacerse el Papanicolaou en la clínica me causa más estrés/ansiedad)	Complete	Spanish (Español)
6929	Using the self-sampling kit is more convenient (Usar el kit de auto-examen es más conveniente)	Both are about the same (Ambos son casi iguales)	Both are about the same (Ambos son casi iguales)	Complete	Spanish (Español)
7224	Using the self-sampling kit is more convenient (Usar el kit de auto-examen es más conveniente)	Getting a Pap test at a clinic is more embarrassing (Hacerse el Papanicolaou en la clínica es más vergonzoso)	Getting a Pap test at a clinic makes me more stressed/anxious (Hacerse el Papanicolaou en la clínica me causa más estrés/ansiedad)	Complete	Spanish (Español)
6286	Both are about the same (Ambos son casi iguales)	Getting a Pap test at a clinic is more embarrassing (Hacerse el Papanicolaou en la clínica es más vergonzoso)	Getting a Pap test at a clinic makes me more stressed/anxious (Hacerse el Papanicolaou en la clínica me causa más estrés/ansiedad)	Complete	Spanish (Español)
5490	Using the self-sampling kit is more convenient (Usar el kit de auto-examen es más conveniente)	Getting a Pap test at a clinic is more embarrassing (Hacerse el Papanicolaou en la clínica es más vergonzoso)	Getting a Pap test at a clinic makes me more stressed/anxious (Hacerse el Papanicolaou en la clínica me causa más estrés/ansiedad)	Complete	Spanish (Español)
6288	Using the self-sampling kit is more convenient (Usar el kit de auto-examen es más conveniente)	Getting a Pap test at a clinic is more embarrassing (Hacerse el Papanicolaou en la clínica es más vergonzoso)	Getting a Pap test at a clinic makes me more stressed/anxious (Hacerse el Papanicolaou en la clínica me causa más estrés/ansiedad)	Complete	Spanish (Español)
6097	Using the self-sampling kit is more convenient (Usar el kit de auto-examen es más conveniente)	Getting a Pap test at a clinic is more embarrassing (Hacerse el Papanicolaou en la clínica es más vergonzoso)	Getting a Pap test at a clinic makes me more stressed/anxious (Hacerse el Papanicolaou en la clínica me causa más estrés/ansiedad)	Complete	Spanish (Español)
5874				Complete	English (Ingles)
5085				Complete	Spanish (Español)
6770				Complete	Spanish (Español)
5724	Using the self-sampling kit is more convenient (Usar el kit de auto-examen es más conveniente)	Getting a Pap test at a clinic is more embarrassing (Hacerse el Papanicolaou en la clínica es más vergonzoso)	Getting a Pap test at a clinic makes me more stressed/anxious (Hacerse el Papanicolaou en la clínica me causa más estrés/ansiedad)	Complete	English (Ingles)
6550	Both are about the same (Ambos son casi iguales)	Getting a Pap test at a clinic is more embarrassing (Hacerse el Papanicolaou en la clínica es más vergonzoso)	Getting a Pap test at a clinic makes me more stressed/anxious (Hacerse el Papanicolaou en la clínica me causa más estrés/ansiedad)	Complete	English (Ingles)
7239				Complete	Spanish (Español)
7425				Complete	Spanish (Español)
7934				Complete	Spanish (Español)
7279	Both are about the same (Ambos son casi iguales)	Both are about the same (Ambos son casi iguales)	Getting a Pap test at a clinic makes me more stressed/anxious (Hacerse el Papanicolaou en la clínica me causa más estrés/ansiedad)	Complete	Spanish (Español)
7935	Using the self-sampling kit is more convenient (Usar el kit de auto-examen es más conveniente)	Getting a Pap test at a clinic is more embarrassing (Hacerse el Papanicolaou en la clínica es más vergonzoso)	Getting a Pap test at a clinic makes me more stressed/anxious (Hacerse el Papanicolaou en la clínica me causa más estrés/ansiedad)	Complete	Spanish (Español)
7314	Using the self-sampling kit is more convenient (Usar el kit de auto-examen es más conveniente)	Both are about the same (Ambos son casi iguales)	Getting a Pap test at a clinic makes me more stressed/anxious (Hacerse el Papanicolaou en la clínica me causa más estrés/ansiedad)	Complete	English (Ingles)
7594	Using the self-sampling kit is more convenient (Usar el kit de auto-examen es más conveniente)	Getting a Pap test at a clinic is more embarrassing (Hacerse el Papanicolaou en la clínica es más vergonzoso)	Getting a Pap test at a clinic makes me more stressed/anxious (Hacerse el Papanicolaou en la clínica me causa más estrés/ansiedad)	Complete	English (Ingles)
2288	Using the self-sampling kit is more convenient (Usar el kit de auto-examen es más conveniente)	Getting a Pap test at a clinic is more embarrassing (Hacerse el Papanicolaou en la clínica es más vergonzoso)	Getting a Pap test at a clinic makes me more stressed/anxious (Hacerse el Papanicolaou en la clínica me causa más estrés/ansiedad)	Complete	English (Ingles)
7148	Both are about the same (Ambos son casi iguales)	Getting a Pap test at a clinic is more embarrassing (Hacerse el Papanicolaou en la clínica es más vergonzoso)	Getting a Pap test at a clinic makes me more stressed/anxious (Hacerse el Papanicolaou en la clínica me causa más estrés/ansiedad)	Complete	Spanish (Español)
7062				Complete	English (Ingles)
7648	Using the self-sampling kit is more convenient (Usar el kit de auto-examen es más conveniente)	Getting a Pap test at a clinic is more embarrassing (Hacerse el Papanicolaou en la clínica es más vergonzoso)	Getting a Pap test at a clinic makes me more stressed/anxious (Hacerse el Papanicolaou en la clínica me causa más estrés/ansiedad)	Complete	English (Ingles)
7064	Using the self-sampling kit is more convenient (Usar el kit de auto-examen es más conveniente)	Getting a Pap test at a clinic is more embarrassing (Hacerse el Papanicolaou en la clínica es más vergonzoso)	Both are about the same (Ambos son casi iguales)	Complete	Spanish (Español)
8312	Using the self-sampling kit is more convenient (Usar el kit de auto-examen es más conveniente)	Getting a Pap test at a clinic is more embarrassing (Hacerse el Papanicolaou en la clínica es más vergonzoso)	Getting a Pap test at a clinic makes me more stressed/anxious (Hacerse el Papanicolaou en la clínica me causa más estrés/ansiedad)	Complete	Spanish (Español)
6085	Using the self-sampling kit is more convenient (Usar el kit de auto-examen es más conveniente)	Getting a Pap test at a clinic is more embarrassing (Hacerse el Papanicolaou en la clínica es más vergonzoso)	Getting a Pap test at a clinic makes me more stressed/anxious (Hacerse el Papanicolaou en la clínica me causa más estrés/ansiedad)	Complete	Spanish (Español)
7323				Complete	Spanish (Español)
7243	Using the self-sampling kit is more convenient (Usar el kit de auto-examen es más conveniente)	Getting a Pap test at a clinic is more embarrassing (Hacerse el Papanicolaou en la clínica es más vergonzoso)	Getting a Pap test at a clinic makes me more stressed/anxious (Hacerse el Papanicolaou en la clínica me causa más estrés/ansiedad)	Complete	Spanish (Español)
2300	Using the self-sampling kit is more convenient (Usar el kit de auto-examen es más conveniente)	Both are about the same (Ambos son casi iguales)	Both are about the same (Ambos son casi iguales)	Complete	English (Ingles)
7555	Getting a Pap test at a clinic is more convenient (Hacerme el Papanicolaou en la clínica es más conveniente)	Getting a Pap test at a clinic is more embarrassing (Hacerse el Papanicolaou en la clínica es más vergonzoso)	Both are about the same (Ambos son casi iguales)	Complete	Spanish (Español)
7123	Using the self-sampling kit is more convenient (Usar el kit de auto-examen es más conveniente)	Getting a Pap test at a clinic is more embarrassing (Hacerse el Papanicolaou en la clínica es más vergonzoso)	Getting a Pap test at a clinic makes me more stressed/anxious (Hacerse el Papanicolaou en la clínica me causa más estrés/ansiedad)	Complete	Spanish (Español)
6342	Using the self-sampling kit is more convenient (Usar el kit de auto-examen es más conveniente)	Getting a Pap test at a clinic is more embarrassing (Hacerse el Papanicolaou en la clínica es más vergonzoso)	Both are about the same (Ambos son casi iguales)	Complete	Spanish (Español)
6592	Both are about the same (Ambos son casi iguales)	Both are about the same (Ambos son casi iguales)	Both are about the same (Ambos son casi iguales)	Complete	English (Ingles)
7677	Getting a Pap test at a clinic is more convenient (Hacerme el Papanicolaou en la clínica es más conveniente)	Getting a Pap test at a clinic is more embarrassing (Hacerse el Papanicolaou en la clínica es más vergonzoso)	Getting a Pap test at a clinic makes me more stressed/anxious (Hacerse el Papanicolaou en la clínica me causa más estrés/ansiedad)	Complete	Spanish (Español)
6633	Using the self-sampling kit is more convenient (Usar el kit de auto-examen es más conveniente)	Getting a Pap test at a clinic is more embarrassing (Hacerse el Papanicolaou en la clínica es más vergonzoso)	Both are about the same (Ambos son casi iguales)	Complete	Spanish (Español)
7320				Complete	English (Ingles)
8307	Both are about the same (Ambos son casi iguales)	Getting a Pap test at a clinic is more embarrassing (Hacerse el Papanicolaou en la clínica es más vergonzoso)	Both are about the same (Ambos son casi iguales)	Complete	Spanish (Español)
7121	Both are about the same (Ambos son casi iguales)	Getting a Pap test at a clinic is more embarrassing (Hacerse el Papanicolaou en la clínica es más vergonzoso)	Getting a Pap test at a clinic makes me more stressed/anxious (Hacerse el Papanicolaou en la clínica me causa más estrés/ansiedad)	Complete	Spanish (Español)
8680				Complete	Spanish (Español)
6548				Complete	English (Ingles)
7788	Using the self-sampling kit is more convenient (Usar el kit de auto-examen es más conveniente)	Getting a Pap test at a clinic is more embarrassing (Hacerse el Papanicolaou en la clínica es más vergonzoso)	Both are about the same (Ambos son casi iguales)	Complete	Spanish (Español)
8026	Using the self-sampling kit is more convenient (Usar el kit de auto-examen es más conveniente)	Getting a Pap test at a clinic is more embarrassing (Hacerse el Papanicolaou en la clínica es más vergonzoso)	Getting a Pap test at a clinic makes me more stressed/anxious (Hacerse el Papanicolaou en la clínica me causa más estrés/ansiedad)	Complete	Spanish (Español)
8901	Both are about the same (Ambos son casi iguales)	Getting a Pap test at a clinic is more embarrassing (Hacerse el Papanicolaou en la clínica es más vergonzoso)	Both are about the same (Ambos son casi iguales)	Complete	Spanish (Español)
5901				Complete	English (Ingles)
6436				Complete	English (Ingles)
9854				Complete	Spanish (Español)
8550	Both are about the same (Ambos son casi iguales)	Getting a Pap test at a clinic is more embarrassing (Hacerse el Papanicolaou en la clínica es más vergonzoso)	Both are about the same (Ambos son casi iguales)	Complete	Spanish (Español)
6799	Both are about the same (Ambos son casi iguales)	Both are about the same (Ambos son casi iguales)	Both are about the same (Ambos son casi iguales)	Complete	English (Ingles)
8952				Complete	Spanish (Español)
9809	Both are about the same (Ambos son casi iguales)	Getting a Pap test at a clinic is more embarrassing (Hacerse el Papanicolaou en la clínica es más vergonzoso)	Getting a Pap test at a clinic makes me more stressed/anxious (Hacerse el Papanicolaou en la clínica me causa más estrés/ansiedad)	Complete	Spanish (Español)
10035	Both are about the same (Ambos son casi iguales)	Getting a Pap test at a clinic is more embarrassing (Hacerse el Papanicolaou en la clínica es más vergonzoso)	Both are about the same (Ambos son casi iguales)	Complete	Spanish (Español)
7827				Complete	English (Ingles)
6304	Using the self-sampling kit is more convenient (Usar el kit de auto-examen es más conveniente)	Both are about the same (Ambos son casi iguales)	Both are about the same (Ambos son casi iguales)	Complete	English (Ingles)
7930				Complete	English (Ingles)
8815	Using the self-sampling kit is more convenient (Usar el kit de auto-examen es más conveniente)	Getting a Pap test at a clinic is more embarrassing (Hacerse el Papanicolaou en la clínica es más vergonzoso)	Getting a Pap test at a clinic makes me more stressed/anxious (Hacerse el Papanicolaou en la clínica me causa más estrés/ansiedad)	Complete	Spanish (Español)
8986				Complete	Spanish (Español)
8062	Using the self-sampling kit is more convenient (Usar el kit de auto-examen es más conveniente)	Getting a Pap test at a clinic is more embarrassing (Hacerse el Papanicolaou en la clínica es más vergonzoso)	Getting a Pap test at a clinic makes me more stressed/anxious (Hacerse el Papanicolaou en la clínica me causa más estrés/ansiedad)	Complete	Spanish (Español)
8055	Both are about the same (Ambos son casi iguales)	Both are about the same (Ambos son casi iguales)	Both are about the same (Ambos son casi iguales)	Complete	English (Ingles)
8698	Using the self-sampling kit is more convenient (Usar el kit de auto-examen es más conveniente)	Getting a Pap test at a clinic is more embarrassing (Hacerse el Papanicolaou en la clínica es más vergonzoso)	Getting a Pap test at a clinic makes me more stressed/anxious (Hacerse el Papanicolaou en la clínica me causa más estrés/ansiedad)	Complete	English (Ingles)
9532	Getting a Pap test at a clinic is more convenient (Hacerme el Papanicolaou en la clínica es más conveniente)	Both are about the same (Ambos son casi iguales)	Both are about the same (Ambos son casi iguales)	Complete	Spanish (Español)
7746	Both are about the same (Ambos son casi iguales)	Both are about the same (Ambos son casi iguales)	Both are about the same (Ambos son casi iguales)	Complete	Spanish (Español)
8682				Complete	Spanish (Español)
8774	Both are about the same (Ambos son casi iguales)	Getting a Pap test at a clinic is more embarrassing (Hacerse el Papanicolaou en la clínica es más vergonzoso)	Both are about the same (Ambos son casi iguales)	Complete	Spanish (Español)
8248	Using the self-sampling kit is more convenient (Usar el kit de auto-examen es más conveniente)	Both are about the same (Ambos son casi iguales)	Getting a Pap test at a clinic makes me more stressed/anxious (Hacerse el Papanicolaou en la clínica me causa más estrés/ansiedad)	Complete	English (Ingles)
8604				Complete	English (Ingles)
8001	Using the self-sampling kit is more convenient (Usar el kit de auto-examen es más conveniente)	Getting a Pap test at a clinic is more embarrassing (Hacerse el Papanicolaou en la clínica es más vergonzoso)	Getting a Pap test at a clinic makes me more stressed/anxious (Hacerse el Papanicolaou en la clínica me causa más estrés/ansiedad)	Complete	English (Ingles)
10059	Using the self-sampling kit is more convenient (Usar el kit de auto-examen es más conveniente)	Getting a Pap test at a clinic is more embarrassing (Hacerse el Papanicolaou en la clínica es más vergonzoso)	Both are about the same (Ambos son casi iguales)	Complete	Spanish (Español)
10455	Using the self-sampling kit is more convenient (Usar el kit de auto-examen es más conveniente)	Getting a Pap test at a clinic is more embarrassing (Hacerse el Papanicolaou en la clínica es más vergonzoso)	Getting a Pap test at a clinic makes me more stressed/anxious (Hacerse el Papanicolaou en la clínica me causa más estrés/ansiedad)	Complete	Spanish (Español)
10273	Getting a Pap test at a clinic is more convenient (Hacerme el Papanicolaou en la clínica es más conveniente)	Getting a Pap test at a clinic is more embarrassing (Hacerse el Papanicolaou en la clínica es más vergonzoso)	Both are about the same (Ambos son casi iguales)	Complete	Spanish (Español)
9749	Getting a Pap test at a clinic is more convenient (Hacerme el Papanicolaou en la clínica es más conveniente)	Both are about the same (Ambos son casi iguales)	Both are about the same (Ambos son casi iguales)	Complete	Spanish (Español)
8161				Complete	English (Ingles)
9713				Complete	Spanish (Español)
9446				Complete	English (Ingles)
8896	Using the self-sampling kit is more convenient (Usar el kit de auto-examen es más conveniente)	Getting a Pap test at a clinic is more embarrassing (Hacerse el Papanicolaou en la clínica es más vergonzoso)	Getting a Pap test at a clinic makes me more stressed/anxious (Hacerse el Papanicolaou en la clínica me causa más estrés/ansiedad)	Complete	English (Ingles)
10200	Using the self-sampling kit is more convenient (Usar el kit de auto-examen es más conveniente)	Both are about the same (Ambos son casi iguales)	Both are about the same (Ambos son casi iguales)	Complete	Spanish (Español)
10272				Complete	English (Ingles)
9576	Using the self-sampling kit is more convenient (Usar el kit de auto-examen es más conveniente)	Both are about the same (Ambos son casi iguales)	Both are about the same (Ambos son casi iguales)	Complete	English (Ingles)
8797				Complete	English (Ingles)
10116	Using the self-sampling kit is more convenient (Usar el kit de auto-examen es más conveniente)	Both are about the same (Ambos son casi iguales)	Both are about the same (Ambos son casi iguales)	Complete	English (Ingles)
10249	Both are about the same (Ambos son casi iguales)	Getting a Pap test at a clinic is more embarrassing (Hacerse el Papanicolaou en la clínica es más vergonzoso)	Getting a Pap test at a clinic makes me more stressed/anxious (Hacerse el Papanicolaou en la clínica me causa más estrés/ansiedad)	Complete	Spanish (Español)
10457	Getting a Pap test at a clinic is more convenient (Hacerme el Papanicolaou en la clínica es más conveniente)	Both are about the same (Ambos son casi iguales)	Both are about the same (Ambos son casi iguales)	Complete	English (Ingles)
13260	Both are about the same (Ambos son casi iguales)	Both are about the same (Ambos son casi iguales)	Both are about the same (Ambos son casi iguales)	Complete	English (Ingles)
9702	Both are about the same (Ambos son casi iguales)	Both are about the same (Ambos son casi iguales)	Both are about the same (Ambos son casi iguales)	Complete	English (Ingles)
10630	Both are about the same (Ambos son casi iguales)	Both are about the same (Ambos son casi iguales)	Both are about the same (Ambos son casi iguales)	Complete	English (Ingles)
10760	Using the self-sampling kit is more convenient (Usar el kit de auto-examen es más conveniente)	Both are about the same (Ambos son casi iguales)	Both are about the same (Ambos son casi iguales)	Complete	Spanish (Español)
10808	Using the self-sampling kit is more convenient (Usar el kit de auto-examen es más conveniente)	Getting a Pap test at a clinic is more embarrassing (Hacerse el Papanicolaou en la clínica es más vergonzoso)	Getting a Pap test at a clinic makes me more stressed/anxious (Hacerse el Papanicolaou en la clínica me causa más estrés/ansiedad)	Complete	Spanish (Español)
11073				Complete	English (Ingles)
11482				Complete	Spanish (Español)
10517	Both are about the same (Ambos son casi iguales)	Both are about the same (Ambos son casi iguales)	Getting a Pap test at a clinic makes me more stressed/anxious (Hacerse el Papanicolaou en la clínica me causa más estrés/ansiedad)	Complete	English (Ingles)
10675				Complete	Spanish (Español)
14069	Using the self-sampling kit is more convenient (Usar el kit de auto-examen es más conveniente)	Getting a Pap test at a clinic is more embarrassing (Hacerse el Papanicolaou en la clínica es más vergonzoso)	Getting a Pap test at a clinic makes me more stressed/anxious (Hacerse el Papanicolaou en la clínica me causa más estrés/ansiedad)	Complete	English (Ingles)
10557	Using the self-sampling kit is more convenient (Usar el kit de auto-examen es más conveniente)	Getting a Pap test at a clinic is more embarrassing (Hacerse el Papanicolaou en la clínica es más vergonzoso)	Getting a Pap test at a clinic makes me more stressed/anxious (Hacerse el Papanicolaou en la clínica me causa más estrés/ansiedad)	Complete	English (Ingles)
13273	Using the self-sampling kit is more convenient (Usar el kit de auto-examen es más conveniente)	Getting a Pap test at a clinic is more embarrassing (Hacerse el Papanicolaou en la clínica es más vergonzoso)	Getting a Pap test at a clinic makes me more stressed/anxious (Hacerse el Papanicolaou en la clínica me causa más estrés/ansiedad)	Complete	Spanish (Español)
11430	Using the self-sampling kit is more convenient (Usar el kit de auto-examen es más conveniente)	Getting a Pap test at a clinic is more embarrassing (Hacerse el Papanicolaou en la clínica es más vergonzoso)	Getting a Pap test at a clinic makes me more stressed/anxious (Hacerse el Papanicolaou en la clínica me causa más estrés/ansiedad)	Complete	English (Ingles)
11098	Both are about the same (Ambos son casi iguales)	Both are about the same (Ambos son casi iguales)	Both are about the same (Ambos son casi iguales)	Complete	English (Ingles)
11391	Both are about the same (Ambos son casi iguales)	Getting a Pap test at a clinic is more embarrassing (Hacerse el Papanicolaou en la clínica es más vergonzoso)	Getting a Pap test at a clinic makes me more stressed/anxious (Hacerse el Papanicolaou en la clínica me causa más estrés/ansiedad)	Complete	Spanish (Español)
12009	Using the self-sampling kit is more convenient (Usar el kit de auto-examen es más conveniente)	Getting a Pap test at a clinic is more embarrassing (Hacerse el Papanicolaou en la clínica es más vergonzoso)	Getting a Pap test at a clinic makes me more stressed/anxious (Hacerse el Papanicolaou en la clínica me causa más estrés/ansiedad)	Complete	English (Ingles)
12116	Using the self-sampling kit is more convenient (Usar el kit de auto-examen es más conveniente)	Both are about the same (Ambos son casi iguales)	Both are about the same (Ambos son casi iguales)	Complete	English (Ingles)
11299	Using the self-sampling kit is more convenient (Usar el kit de auto-examen es más conveniente)	Getting a Pap test at a clinic is more embarrassing (Hacerse el Papanicolaou en la clínica es más vergonzoso)	Both are about the same (Ambos son casi iguales)	Complete	English (Ingles)
11446				Complete	English (Ingles)
11677	Getting a Pap test at a clinic is more convenient (Hacerme el Papanicolaou en la clínica es más conveniente)	Getting a Pap test at a clinic is more embarrassing (Hacerse el Papanicolaou en la clínica es más vergonzoso)	Getting a Pap test at a clinic makes me more stressed/anxious (Hacerse el Papanicolaou en la clínica me causa más estrés/ansiedad)	Complete	English (Ingles)
11969				Complete	English (Ingles)
12196	Using the self-sampling kit is more convenient (Usar el kit de auto-examen es más conveniente)	Getting a Pap test at a clinic is more embarrassing (Hacerse el Papanicolaou en la clínica es más vergonzoso)	Both are about the same (Ambos son casi iguales)	Complete	Spanish (Español)
13253				Complete	Spanish (Español)
13305	Using the self-sampling kit is more convenient (Usar el kit de auto-examen es más conveniente)	Getting a Pap test at a clinic is more embarrassing (Hacerse el Papanicolaou en la clínica es más vergonzoso)	Getting a Pap test at a clinic makes me more stressed/anxious (Hacerse el Papanicolaou en la clínica me causa más estrés/ansiedad)	Complete	Spanish (Español)
13729				Complete	Spanish (Español)
11330	Getting a Pap test at a clinic is more convenient (Hacerme el Papanicolaou en la clínica es más conveniente)	Both are about the same (Ambos son casi iguales)	Both are about the same (Ambos son casi iguales)	Complete	Spanish (Español)
13093	Using the self-sampling kit is more convenient (Usar el kit de auto-examen es más conveniente)	Getting a Pap test at a clinic is more embarrassing (Hacerse el Papanicolaou en la clínica es más vergonzoso)	Both are about the same (Ambos son casi iguales)	Complete	Spanish (Español)
11173	Getting a Pap test at a clinic is more convenient (Hacerme el Papanicolaou en la clínica es más conveniente)	Getting a Pap test at a clinic is more embarrassing (Hacerse el Papanicolaou en la clínica es más vergonzoso)	Both are about the same (Ambos son casi iguales)	Complete	Spanish (Español)
12525	Using the self-sampling kit is more convenient (Usar el kit de auto-examen es más conveniente)	Both are about the same (Ambos son casi iguales)	Getting a Pap test at a clinic makes me more stressed/anxious (Hacerse el Papanicolaou en la clínica me causa más estrés/ansiedad)	Complete	Spanish (Español)
13461				Complete	Spanish (Español)
12502				Complete	Spanish (Español)
11690				Complete	Spanish (Español)
13410	Using the self-sampling kit is more convenient (Usar el kit de auto-examen es más conveniente)	Getting a Pap test at a clinic is more embarrassing (Hacerse el Papanicolaou en la clínica es más vergonzoso)	Both are about the same (Ambos son casi iguales)	Complete	Spanish (Español)
7277				Complete	Spanish (Español)
12625				Complete	Spanish (Español)
13593				Complete	Spanish (Español)
12133				Complete	Spanish (Español)
12635				Complete	Spanish (Español)
6665				Complete	Spanish (Español)
