# Supplementary material for: Perceived barriers to cervical cancer screening and motivators for at-home human papillomavirus self-sampling during the COVID-19 pandemic: Results from a telephone survey
Source: eLife journal article supplement (doi:10.7554/elife.84664), 2023-05-26
Supplement: supp [file elife_poa_e84664_Table_4_source_data_1.xls]

## Sheet: PRESTIS-CompletedSurveys_DATA_L
Record ID	E7. Do you think that the COVID-19 (coronavirus) pandemic influenced your decision to use the self-testing kit rather than going to a clinic to get a Pap test?(¿Cree que la pandemia COVID-19 (coronavirus) influyó en su decisión de usar el kit de auto muestra en lugar de ir a una clínica para hacerce una prueba de Papanicolao?)	E8. In what way? (Record verbatim)(¿De qué manera?)	AA8. Language of interview (Idioma de entrevista)	Verbal consent given?	B8. Has the COVID-19 (coronavirus) pandemic affected your physical health? Would you say…(¿La pandemia COVID-19 (coronavirus) ha afectado su salud física? ¿Diría que...)	B9. Has the COVID-19 (coronavirus) pandemic impacted your mental health? Would you say…(¿La pandemia COVID-19 (coronavirus) ha afectado su salud mental? ¿Diría que...)	B10. Has the COVID-19 (coronavirus) pandemic affected your economic situation? Would you say…(¿La pandemia COVID-19 (coronavirus) ha afectado su situación económica? ¿Diría que...)
453	No		Spanish (Español)	Yes	It has had a small effect (Ha tenido un pequeño efecto)	It hasn't affected my mental health (No ha afectado mi salud mental)	It hasn't affected my economic situation (No ha afectado mi situación económica)
702	No		Spanish (Español)	Yes	It hasn't affected my physical health (No ha afectado mi salud física)	It hasn't affected my mental health (No ha afectado mi salud mental)	It has had a small effect (Ha tenido un pequeño efecto)
2055	Yes (Si)	Didn't want to be in a clinic around a bunch of people. And it's almost impossible to get an appointment during the pandemic	English (Ingles)	Yes	It hasn't affected my physical health (No ha afectado mi salud física)	It has had a small effect (Ha tenido un pequeño efecto)	It hasn't affected my economic situation (No ha afectado mi situación económica)
358	No		Spanish (Español)	Yes	It hasn't affected my physical health (No ha afectado mi salud física)	It hasn't affected my mental health (No ha afectado mi salud mental)	It has had a small effect (Ha tenido un pequeño efecto)
412			Spanish (Español)	Yes	It hasn't affected my physical health (No ha afectado mi salud física)	It hasn't affected my mental health (No ha afectado mi salud mental)	It has had a large effect (Ha tenido un gran efecto)
322	Yes (Si)	That was the only way I could get it.	English (Ingles)	Yes	It hasn't affected my physical health (No ha afectado mi salud física)	It has had a small effect (Ha tenido un pequeño efecto)	It has had a small effect (Ha tenido un pequeño efecto)
152	Yes (Si)	Me tocaba ir para el papanicolau pero no puede consiguir cita	Spanish (Español)	Yes	It has had a small effect (Ha tenido un pequeño efecto)	It has had a small effect (Ha tenido un pequeño efecto)	It has had a large effect (Ha tenido un gran efecto)
1204	Yes (Si)	no tengo que ir a clinica con much gente	Spanish (Español)	Yes	It hasn't affected my physical health (No ha afectado mi salud física)	It hasn't affected my mental health (No ha afectado mi salud mental)	It hasn't affected my economic situation (No ha afectado mi situación económica)
1436	Yes (Si)	TO me it was safer to do it at home than going to the clinic	English (Ingles)	Yes	It hasn't affected my physical health (No ha afectado mi salud física)	It has had a small effect (Ha tenido un pequeño efecto)	It has had a small effect (Ha tenido un pequeño efecto)
469	No		English (Ingles)	Yes	It hasn't affected my physical health (No ha afectado mi salud física)	It hasn't affected my mental health (No ha afectado mi salud mental)	It has had a large effect (Ha tenido un gran efecto)
922	Yes (Si)	Because everything was shut down at the time.	English (Ingles)	Yes	It hasn't affected my physical health (No ha afectado mi salud física)	It has had a small effect (Ha tenido un pequeño efecto)	It has had a large effect (Ha tenido un gran efecto)
973			English (Ingles)	Yes	It hasn't affected my physical health (No ha afectado mi salud física)	It has had a small effect (Ha tenido un pequeño efecto)	It has had a large effect (Ha tenido un gran efecto)
2514	No		English (Ingles)	Yes	It has had a small effect (Ha tenido un pequeño efecto)	It hasn't affected my mental health (No ha afectado mi salud mental)	It has had a small effect (Ha tenido un pequeño efecto)
991			Spanish (Español)	Yes	It hasn't affected my physical health (No ha afectado mi salud física)	It hasn't affected my mental health (No ha afectado mi salud mental)	It has had a small effect (Ha tenido un pequeño efecto)
1526			English (Ingles)	Yes	It hasn't affected my physical health (No ha afectado mi salud física)	It hasn't affected my mental health (No ha afectado mi salud mental)	It has had a small effect (Ha tenido un pequeño efecto)
1745	Yes (Si)	I think it's easier, you know, because I was scared to be around a lot of people.	English (Ingles)	Yes	It has had a small effect (Ha tenido un pequeño efecto)	It has had a small effect (Ha tenido un pequeño efecto)	It hasn't affected my economic situation (No ha afectado mi situación económica)
2215	No		English (Ingles)	Yes	It has had a large effect (Ha tenido un gran efecto)	It hasn't affected my mental health (No ha afectado mi salud mental)	It has had a small effect (Ha tenido un pequeño efecto)
2621	Yes (Si)	Because I felt safer not going into the clinic and being around people	Spanish (Español)	Yes	It hasn't affected my physical health (No ha afectado mi salud física)	It hasn't affected my mental health (No ha afectado mi salud mental)	It has had a large effect (Ha tenido un gran efecto)
2663	No		Spanish (Español)	Yes	It hasn't affected my physical health (No ha afectado mi salud física)	It hasn't affected my mental health (No ha afectado mi salud mental)	It hasn't affected my economic situation (No ha afectado mi situación económica)
2740	Yes (Si)	Well, I didn't have to go get up on the table it is embarrassing so the kit helped a lot.	English (Ingles)	Yes	It has had a large effect (Ha tenido un gran efecto)	It has had a small effect (Ha tenido un pequeño efecto)	It has had a large effect (Ha tenido un gran efecto)
1718	Yes (Si)	Si por que tenia cita y no puede ir a la clinica.	Spanish (Español)	Yes	It has had a small effect (Ha tenido un pequeño efecto)	It has had a small effect (Ha tenido un pequeño efecto)	It has had a small effect (Ha tenido un pequeño efecto)
277	No		Spanish (Español)	Yes	It hasn't affected my physical health (No ha afectado mi salud física)	It has had a small effect (Ha tenido un pequeño efecto)	It has had a small effect (Ha tenido un pequeño efecto)
2004			Spanish (Español)	Yes	It hasn't affected my physical health (No ha afectado mi salud física)	It hasn't affected my mental health (No ha afectado mi salud mental)	It has had a large effect (Ha tenido un gran efecto)
2330	Yes (Si)	Me siente mas comoda por la pandemia no ir a clinica	Spanish (Español)	Yes	It hasn't affected my physical health (No ha afectado mi salud física)	It hasn't affected my mental health (No ha afectado mi salud mental)	It has had a large effect (Ha tenido un gran efecto)
2378	No		English (Ingles)	Yes	It has had a small effect (Ha tenido un pequeño efecto)	It has had a small effect (Ha tenido un pequeño efecto)	It has had a large effect (Ha tenido un gran efecto)
2541	No		English (Ingles)	Yes	It hasn't affected my physical health (No ha afectado mi salud física)	It hasn't affected my mental health (No ha afectado mi salud mental)	It hasn't affected my economic situation (No ha afectado mi situación económica)
1796			Spanish (Español)	Yes	It has had a small effect (Ha tenido un pequeño efecto)	It has had a small effect (Ha tenido un pequeño efecto)	It has had a small effect (Ha tenido un pequeño efecto)
2490	Yes (Si)	Se me hiso mas facil de hacerlo en la casa para mejor cuidado	Spanish (Español)	Yes	It hasn't affected my physical health (No ha afectado mi salud física)	It hasn't affected my mental health (No ha afectado mi salud mental)	It has had a small effect (Ha tenido un pequeño efecto)
1100	No		English (Ingles)	Yes	It hasn't affected my physical health (No ha afectado mi salud física)	It has had a small effect (Ha tenido un pequeño efecto)	It has had a large effect (Ha tenido un gran efecto)
2529	Yes (Si)	Estaban las clincas cerradas	Spanish (Español)	Yes	It has had a large effect (Ha tenido un gran efecto)	It has had a large effect (Ha tenido un gran efecto)	It has had a large effect (Ha tenido un gran efecto)
2651	Yes (Si)	Porque no sabes cuanta gente este el la clinica y si estan enfermos	Spanish (Español)	Yes	It hasn't affected my physical health (No ha afectado mi salud física)	It hasn't affected my mental health (No ha afectado mi salud mental)	It has had a small effect (Ha tenido un pequeño efecto)
2082	Yes (Si)	Me siente mas segura	Spanish (Español)	Yes	It hasn't affected my physical health (No ha afectado mi salud física)	It hasn't affected my mental health (No ha afectado mi salud mental)	It has had a small effect (Ha tenido un pequeño efecto)
2683	No		Spanish (Español)	Yes	It hasn't affected my physical health (No ha afectado mi salud física)	It hasn't affected my mental health (No ha afectado mi salud mental)	It has had a small effect (Ha tenido un pequeño efecto)
2876			Spanish (Español)	Yes	It has had a small effect (Ha tenido un pequeño efecto)	It has had a small effect (Ha tenido un pequeño efecto)	It has had a large effect (Ha tenido un gran efecto)
402			Spanish (Español)	Yes	It has had a small effect (Ha tenido un pequeño efecto)	It has had a small effect (Ha tenido un pequeño efecto)	It has had a large effect (Ha tenido un gran efecto)
655	No		English (Ingles)	Yes	It hasn't affected my physical health (No ha afectado mi salud física)	It hasn't affected my mental health (No ha afectado mi salud mental)	It has had a small effect (Ha tenido un pequeño efecto)
3226	Yes (Si)	Fue mejor en mi casa que ir a la clinica	Spanish (Español)	Yes	It hasn't affected my physical health (No ha afectado mi salud física)	It hasn't affected my mental health (No ha afectado mi salud mental)	It has had a small effect (Ha tenido un pequeño efecto)
2059			Spanish (Español)	Yes	It has had a small effect (Ha tenido un pequeño efecto)	It has had a small effect (Ha tenido un pequeño efecto)	It has had a large effect (Ha tenido un gran efecto)
3051	No		Spanish (Español)	Yes	It has had a large effect (Ha tenido un gran efecto)	It has had a large effect (Ha tenido un gran efecto)	It has had a large effect (Ha tenido un gran efecto)
230	Yes (Si)	It was much easy that to go get the test. I think it was much safer.	English (Ingles)	Yes	It has had a small effect (Ha tenido un pequeño efecto)	It has had a small effect (Ha tenido un pequeño efecto)	It has had a small effect (Ha tenido un pequeño efecto)
3057	Yes (Si)	Si porque no quiera ir a la clinica para el examen	Spanish (Español)	Yes	It hasn't affected my physical health (No ha afectado mi salud física)	It hasn't affected my mental health (No ha afectado mi salud mental)	It has had a small effect (Ha tenido un pequeño efecto)
3358	Yes (Si)	Porque tengo mideo de contiagjair el virus	Spanish (Español)	Yes	It has had a small effect (Ha tenido un pequeño efecto)	It hasn't affected my mental health (No ha afectado mi salud mental)	It has had a large effect (Ha tenido un gran efecto)
3499			English (Ingles)	Yes	It has had a large effect (Ha tenido un gran efecto)	It has had a large effect (Ha tenido un gran efecto)	It has had a large effect (Ha tenido un gran efecto)
3065	Yes (Si)	It was just convenient to be able to do it at home and be comfortable at home and not be exposed to Covid at a facility. It was just convenient to do it in the privacy of my own home. I enjoyed learning how to do it on my own.	English (Ingles)	Yes	It has had a small effect (Ha tenido un pequeño efecto)	It has had a small effect (Ha tenido un pequeño efecto)	It has had a large effect (Ha tenido un gran efecto)
3380	No		English (Ingles)	Yes	It has had a small effect (Ha tenido un pequeño efecto)	It has had a small effect (Ha tenido un pequeño efecto)	It has had a large effect (Ha tenido un gran efecto)
3614			English (Ingles)	Yes	It has had a small effect (Ha tenido un pequeño efecto)	It has had a small effect (Ha tenido un pequeño efecto)	It has had a large effect (Ha tenido un gran efecto)
3868			Spanish (Español)	Yes	It hasn't affected my physical health (No ha afectado mi salud física)	It has had a small effect (Ha tenido un pequeño efecto)	It has had a small effect (Ha tenido un pequeño efecto)
4033	Yes (Si)	si por el miedo de la pandemia	Spanish (Español)	Yes	It has had a small effect (Ha tenido un pequeño efecto)	It hasn't affected my mental health (No ha afectado mi salud mental)	It has had a small effect (Ha tenido un pequeño efecto)
4036	No		Spanish (Español)	Yes	It hasn't affected my physical health (No ha afectado mi salud física)	It has had a small effect (Ha tenido un pequeño efecto)	It has had a small effect (Ha tenido un pequeño efecto)
3618			Spanish (Español)	Yes	It has had a small effect (Ha tenido un pequeño efecto)	It has had a small effect (Ha tenido un pequeño efecto)	It has had a small effect (Ha tenido un pequeño efecto)
3647	Yes (Si)	Por los risegos de ir a la clinica	Spanish (Español)	Yes	It hasn't affected my physical health (No ha afectado mi salud física)	It hasn't affected my mental health (No ha afectado mi salud mental)	It has had a large effect (Ha tenido un gran efecto)
3604	Yes (Si)	Hay mucha gente el la clinica y me dio mideo	Spanish (Español)	Yes	It hasn't affected my physical health (No ha afectado mi salud física)	It hasn't affected my mental health (No ha afectado mi salud mental)	It hasn't affected my economic situation (No ha afectado mi situación económica)
3621	No		Spanish (Español)	Yes	It has had a large effect (Ha tenido un gran efecto)	It has had a small effect (Ha tenido un pequeño efecto)	It has had a large effect (Ha tenido un gran efecto)
4240			English (Ingles)	Yes	It has had a small effect (Ha tenido un pequeño efecto)	It has had a large effect (Ha tenido un gran efecto)	It has had a large effect (Ha tenido un gran efecto)
3644			Spanish (Español)	Yes	It has had a small effect (Ha tenido un pequeño efecto)	It hasn't affected my mental health (No ha afectado mi salud mental)	It hasn't affected my economic situation (No ha afectado mi situación económica)
4063	Yes (Si)	Ir a la clinica hay mucha gente y no quiera estar con mucha gente	Spanish (Español)	Yes	It hasn't affected my physical health (No ha afectado mi salud física)	It hasn't affected my mental health (No ha afectado mi salud mental)	It has had a small effect (Ha tenido un pequeño efecto)
3671	Yes (Si)	porque no estan dando muchas citas	Spanish (Español)	Yes	It hasn't affected my physical health (No ha afectado mi salud física)	It hasn't affected my mental health (No ha afectado mi salud mental)	It hasn't affected my economic situation (No ha afectado mi situación económica)
3387			Spanish (Español)	Yes	It has had a small effect (Ha tenido un pequeño efecto)	It has had a small effect (Ha tenido un pequeño efecto)	It has had a large effect (Ha tenido un gran efecto)
3606	No		Spanish (Español)	Yes	It hasn't affected my physical health (No ha afectado mi salud física)	It hasn't affected my mental health (No ha afectado mi salud mental)	It has had a small effect (Ha tenido un pequeño efecto)
4886	Yes (Si)	no me sienta comoda ir a la clinica	Spanish (Español)	Yes	It hasn't affected my physical health (No ha afectado mi salud física)	It hasn't affected my mental health (No ha afectado mi salud mental)	It has had a large effect (Ha tenido un gran efecto)
4895	Yes (Si)	I couldn't go in-person because everything was shut down	English (Ingles)	Yes	It has had a large effect (Ha tenido un gran efecto)	It has had a small effect (Ha tenido un pequeño efecto)	It has had a small effect (Ha tenido un pequeño efecto)
4392	Yes (Si)	My healthcare provider wasn't offering in-person visits, so I jumped on it because I needed to get my yearly exam.	English (Ingles)	Yes	It hasn't affected my physical health (No ha afectado mi salud física)	It has had a large effect (Ha tenido un gran efecto)	It hasn't affected my economic situation (No ha afectado mi situación económica)
4553			Spanish (Español)	Yes	It hasn't affected my physical health (No ha afectado mi salud física)	It hasn't affected my mental health (No ha afectado mi salud mental)	It hasn't affected my economic situation (No ha afectado mi situación económica)
4600			Spanish (Español)	Yes	It hasn't affected my physical health (No ha afectado mi salud física)	It hasn't affected my mental health (No ha afectado mi salud mental)	It has had a small effect (Ha tenido un pequeño efecto)
4424			English (Ingles)	Yes	It has had a large effect (Ha tenido un gran efecto)	It has had a large effect (Ha tenido un gran efecto)	It has had a large effect (Ha tenido un gran efecto)
4723			English (Ingles)	Yes	It hasn't affected my physical health (No ha afectado mi salud física)	It has had a small effect (Ha tenido un pequeño efecto)	It has had a large effect (Ha tenido un gran efecto)
4403	Yes (Si)	to not be in contact with other people	Spanish (Español)	Yes	It hasn't affected my physical health (No ha afectado mi salud física)	It has had a small effect (Ha tenido un pequeño efecto)	It has had a large effect (Ha tenido un gran efecto)
4539	Yes (Si)	I felt like I didn't have to make an appointment for this, even though I was aware that I had HPV before. Also I didn't have to be around other sick people by going into a clinic.	English (Ingles)	Yes	It hasn't affected my physical health (No ha afectado mi salud física)	It has had a small effect (Ha tenido un pequeño efecto)	It has had a large effect (Ha tenido un gran efecto)
4442	Yes (Si)	I feel more safe doing it here at home in a cleaner environment than out there. With COVID you don't know what you're going to touch, you know?	English (Ingles)	Yes	It has had a small effect (Ha tenido un pequeño efecto)	It has had a small effect (Ha tenido un pequeño efecto)	It has had a large effect (Ha tenido un gran efecto)
4774	No		English (Ingles)	Yes	It hasn't affected my physical health (No ha afectado mi salud física)	It hasn't affected my mental health (No ha afectado mi salud mental)	It hasn't affected my economic situation (No ha afectado mi situación económica)
5139	No		Spanish (Español)	Yes	It hasn't affected my physical health (No ha afectado mi salud física)	It hasn't affected my mental health (No ha afectado mi salud mental)	It has had a small effect (Ha tenido un pequeño efecto)
5212			Spanish (Español)	Yes	It has had a large effect (Ha tenido un gran efecto)	It has had a large effect (Ha tenido un gran efecto)	It hasn't affected my economic situation (No ha afectado mi situación económica)
5202	No		Spanish (Español)	Yes	It hasn't affected my physical health (No ha afectado mi salud física)	It hasn't affected my mental health (No ha afectado mi salud mental)	It has had a small effect (Ha tenido un pequeño efecto)
5371			English (Ingles)	Yes	It hasn't affected my physical health (No ha afectado mi salud física)	It has had a large effect (Ha tenido un gran efecto)	It has had a large effect (Ha tenido un gran efecto)
4802	Yes (Si)	I didn't want to go to a clinic and someone else be positive. I felt like it was safer.	English (Ingles)	Yes	It has had a small effect (Ha tenido un pequeño efecto)	It has had a small effect (Ha tenido un pequeño efecto)	It has had a large effect (Ha tenido un gran efecto)
5245			Spanish (Español)	Yes	It hasn't affected my physical health (No ha afectado mi salud física)	It has had a small effect (Ha tenido un pequeño efecto)	It has had a small effect (Ha tenido un pequeño efecto)
5352	Yes (Si)	por que no me daban una cita en la clinica	Spanish (Español)	Yes	It hasn't affected my physical health (No ha afectado mi salud física)	It has had a small effect (Ha tenido un pequeño efecto)	It has had a small effect (Ha tenido un pequeño efecto)
4460			English (Ingles)	Yes	It hasn't affected my physical health (No ha afectado mi salud física)	It hasn't affected my mental health (No ha afectado mi salud mental)	It has had a large effect (Ha tenido un gran efecto)
5016	Yes (Si)	It was safer for me to do it myself than be out in public during the pandemic.	English (Ingles)	Yes	It hasn't affected my physical health (No ha afectado mi salud física)	It has had a small effect (Ha tenido un pequeño efecto)	It has had a large effect (Ha tenido un gran efecto)
5129			English (Ingles)	Yes	It has had a large effect (Ha tenido un gran efecto)	It hasn't affected my mental health (No ha afectado mi salud mental)	It hasn't affected my economic situation (No ha afectado mi situación económica)
4443	Yes (Si)	por que no tuve que hacer cita ni ir a la clincia y mas facil	Spanish (Español)	Yes	It hasn't affected my physical health (No ha afectado mi salud física)	It hasn't affected my mental health (No ha afectado mi salud mental)	It hasn't affected my economic situation (No ha afectado mi situación económica)
4468			Spanish (Español)	Yes	It has had a small effect (Ha tenido un pequeño efecto)	It hasn't affected my mental health (No ha afectado mi salud mental)	It has had a small effect (Ha tenido un pequeño efecto)
4480			Spanish (Español)	Yes	It hasn't affected my physical health (No ha afectado mi salud física)	It hasn't affected my mental health (No ha afectado mi salud mental)	It has had a small effect (Ha tenido un pequeño efecto)
4794	Yes (Si)	I'd rather do it at home than havve to go into a medical center somewhere	English (Ingles)	Yes	It hasn't affected my physical health (No ha afectado mi salud física)	It has had a large effect (Ha tenido un gran efecto)	It has had a large effect (Ha tenido un gran efecto)
4983	No		English (Ingles)	Yes	It hasn't affected my physical health (No ha afectado mi salud física)	It hasn't affected my mental health (No ha afectado mi salud mental)	It hasn't affected my economic situation (No ha afectado mi situación económica)
5420	No		Spanish (Español)	Yes	It hasn't affected my physical health (No ha afectado mi salud física)	It hasn't affected my mental health (No ha afectado mi salud mental)	It has had a small effect (Ha tenido un pequeño efecto)
5303			Spanish (Español)	Yes	It hasn't affected my physical health (No ha afectado mi salud física)	It hasn't affected my mental health (No ha afectado mi salud mental)	It has had a large effect (Ha tenido un gran efecto)
5512	Yes (Si)	Because in order to go in you have to have a mask, but because I only have one lung it's hard for me to breathe with a mask so I chose to do it that way.	English (Ingles)	Yes	It has had a small effect (Ha tenido un pequeño efecto)	It hasn't affected my mental health (No ha afectado mi salud mental)	It has had a small effect (Ha tenido un pequeño efecto)
5534	No		English (Ingles)	Yes	It hasn't affected my physical health (No ha afectado mi salud física)	It hasn't affected my mental health (No ha afectado mi salud mental)	It hasn't affected my economic situation (No ha afectado mi situación económica)
5623	No		English (Ingles)	Yes	It has had a large effect (Ha tenido un gran efecto)	It has had a small effect (Ha tenido un pequeño efecto)	It has had a large effect (Ha tenido un gran efecto)
5937	Yes (Si)	No queria ir a la clinica por la pandemia. Fue terrible tener COVID	Spanish (Español)	Yes	It has had a small effect (Ha tenido un pequeño efecto)	It has had a small effect (Ha tenido un pequeño efecto)	It has had a large effect (Ha tenido un gran efecto)
5671			English (Ingles)	Yes	It hasn't affected my physical health (No ha afectado mi salud física)	It hasn't affected my mental health (No ha afectado mi salud mental)	It has had a large effect (Ha tenido un gran efecto)
5820	I don't know (No se)	no se por que me lo mandaron y la doctora tambien me mandaron la orden so use el kit	Spanish (Español)	Yes	It has had a small effect (Ha tenido un pequeño efecto)	It has had a small effect (Ha tenido un pequeño efecto)	It has had a large effect (Ha tenido un gran efecto)
5932			English (Ingles)	Yes	It has had a large effect (Ha tenido un gran efecto)	It has had a large effect (Ha tenido un gran efecto)	It has had a small effect (Ha tenido un pequeño efecto)
5621	Yes (Si)	it was harder to get a clinic appointment	Spanish (Español)	Yes	It hasn't affected my physical health (No ha afectado mi salud física)	It hasn't affected my mental health (No ha afectado mi salud mental)	It has had a small effect (Ha tenido un pequeño efecto)
5811			Spanish (Español)	Yes	It hasn't affected my physical health (No ha afectado mi salud física)	It has had a large effect (Ha tenido un gran efecto)	It has had a large effect (Ha tenido un gran efecto)
5848	Yes (Si)	estaba mas facil	Spanish (Español)	Yes	It has had a small effect (Ha tenido un pequeño efecto)	It has had a small effect (Ha tenido un pequeño efecto)	It has had a large effect (Ha tenido un gran efecto)
5694	No		Spanish (Español)	Yes	It has had a large effect (Ha tenido un gran efecto)	It has had a large effect (Ha tenido un gran efecto)	It has had a large effect (Ha tenido un gran efecto)
4967			Spanish (Español)	Yes	It hasn't affected my physical health (No ha afectado mi salud física)	It hasn't affected my mental health (No ha afectado mi salud mental)	It has had a small effect (Ha tenido un pequeño efecto)
5393			Spanish (Español)	Yes	It has had a large effect (Ha tenido un gran efecto)	It has had a large effect (Ha tenido un gran efecto)	It has had a large effect (Ha tenido un gran efecto)
4930	No		Spanish (Español)	Yes	It hasn't affected my physical health (No ha afectado mi salud física)	It hasn't affected my mental health (No ha afectado mi salud mental)	It has had a small effect (Ha tenido un pequeño efecto)
5577	No		Spanish (Español)	Yes	It hasn't affected my physical health (No ha afectado mi salud física)	It hasn't affected my mental health (No ha afectado mi salud mental)	It hasn't affected my economic situation (No ha afectado mi situación económica)
6089			Spanish (Español)	Yes	It has had a small effect (Ha tenido un pequeño efecto)	It has had a small effect (Ha tenido un pequeño efecto)	It has had a large effect (Ha tenido un gran efecto)
6291			Spanish (Español)	Yes	It hasn't affected my physical health (No ha afectado mi salud física)	It has had a small effect (Ha tenido un pequeño efecto)	It has had a small effect (Ha tenido un pequeño efecto)
6420			Spanish (Español)	Yes	It has had a small effect (Ha tenido un pequeño efecto)	It hasn't affected my mental health (No ha afectado mi salud mental)	It has had a small effect (Ha tenido un pequeño efecto)
6356			English (Ingles)	Yes	It hasn't affected my physical health (No ha afectado mi salud física)	It has had a small effect (Ha tenido un pequeño efecto)	It hasn't affected my economic situation (No ha afectado mi situación económica)
6215	Yes (Si)	The fact that a lot of people don't want to wear a mask and my son is not vaccinated. It was better that I could do it in my own home. It was safer.	English (Ingles)	Yes	It has had a large effect (Ha tenido un gran efecto)	It has had a small effect (Ha tenido un pequeño efecto)	It has had a large effect (Ha tenido un gran efecto)
6448	Yes (Si)	Because I was able to use it in my own home. No traveling	English (Ingles)	Yes	It has had a large effect (Ha tenido un gran efecto)	It has had a small effect (Ha tenido un pequeño efecto)	It hasn't affected my economic situation (No ha afectado mi situación económica)
6720	No		Spanish (Español)	Yes	It hasn't affected my physical health (No ha afectado mi salud física)	It has had a small effect (Ha tenido un pequeño efecto)	It has had a large effect (Ha tenido un gran efecto)
5775	Yes (Si)	no estaba salendo para ir al centro medico	Spanish (Español)	Yes	It hasn't affected my physical health (No ha afectado mi salud física)	It has had a large effect (Ha tenido un gran efecto)	It has had a large effect (Ha tenido un gran efecto)
6816	Yes (Si)	era mas seguero no tanto contacto con gente	Spanish (Español)	Yes	It hasn't affected my physical health (No ha afectado mi salud física)	It hasn't affected my mental health (No ha afectado mi salud mental)	It has had a small effect (Ha tenido un pequeño efecto)
5766			English (Ingles)	Yes	It has had a small effect (Ha tenido un pequeño efecto)	It has had a large effect (Ha tenido un gran efecto)	It has had a small effect (Ha tenido un pequeño efecto)
6021			Spanish (Español)	Yes	It has had a small effect (Ha tenido un pequeño efecto)	It has had a large effect (Ha tenido un gran efecto)	It has had a small effect (Ha tenido un pequeño efecto)
6268	No		Spanish (Español)	Yes	It has had a small effect (Ha tenido un pequeño efecto)	It has had a small effect (Ha tenido un pequeño efecto)	It has had a small effect (Ha tenido un pequeño efecto)
6929	No		Spanish (Español)	Yes	It hasn't affected my physical health (No ha afectado mi salud física)	It hasn't affected my mental health (No ha afectado mi salud mental)	It has had a large effect (Ha tenido un gran efecto)
7224	Yes (Si)	i was scared to go to the clinic	Spanish (Español)	Yes	It hasn't affected my physical health (No ha afectado mi salud física)	It has had a small effect (Ha tenido un pequeño efecto)	It has had a small effect (Ha tenido un pequeño efecto)
6286	Yes (Si)	si por que no me gusta ir a la clinica o el hospital	Spanish (Español)	Yes	It hasn't affected my physical health (No ha afectado mi salud física)	It hasn't affected my mental health (No ha afectado mi salud mental)	It has had a small effect (Ha tenido un pequeño efecto)
5490	Yes (Si)	it is hard to go to the clinic right now they won't even let me go in for my medicine they send it to me	Spanish (Español)	Yes	It has had a small effect (Ha tenido un pequeño efecto)	It hasn't affected my mental health (No ha afectado mi salud mental)	It has had a small effect (Ha tenido un pequeño efecto)
6288	Yes (Si)	with the pandemic i did not want to go into the clinic for an appointment	Spanish (Español)	Yes	It hasn't affected my physical health (No ha afectado mi salud física)	It hasn't affected my mental health (No ha afectado mi salud mental)	It has had a large effect (Ha tenido un gran efecto)
6097	No		Spanish (Español)	Yes	It hasn't affected my physical health (No ha afectado mi salud física)	It hasn't affected my mental health (No ha afectado mi salud mental)	It hasn't affected my economic situation (No ha afectado mi situación económica)
5874			English (Ingles)	Yes	It hasn't affected my physical health (No ha afectado mi salud física)	It has had a large effect (Ha tenido un gran efecto)	It hasn't affected my economic situation (No ha afectado mi situación económica)
5085			Spanish (Español)	Yes	It hasn't affected my physical health (No ha afectado mi salud física)	It hasn't affected my mental health (No ha afectado mi salud mental)	It hasn't affected my economic situation (No ha afectado mi situación económica)
6770			Spanish (Español)	Yes	It has had a large effect (Ha tenido un gran efecto)	It hasn't affected my mental health (No ha afectado mi salud mental)	It has had a small effect (Ha tenido un pequeño efecto)
5724	No		English (Ingles)	Yes	It hasn't affected my physical health (No ha afectado mi salud física)	It hasn't affected my mental health (No ha afectado mi salud mental)	It hasn't affected my economic situation (No ha afectado mi situación económica)
6550	Yes (Si)	Yes, because i didn't have to go out and be exposed to covid	English (Ingles)	Yes	It has had a small effect (Ha tenido un pequeño efecto)	It has had a small effect (Ha tenido un pequeño efecto)	It has had a large effect (Ha tenido un gran efecto)
7239			Spanish (Español)	Yes	It hasn't affected my physical health (No ha afectado mi salud física)	It hasn't affected my mental health (No ha afectado mi salud mental)	It has had a large effect (Ha tenido un gran efecto)
7425			Spanish (Español)	Yes	It hasn't affected my physical health (No ha afectado mi salud física)	It hasn't affected my mental health (No ha afectado mi salud mental)	It hasn't affected my economic situation (No ha afectado mi situación económica)
7934			Spanish (Español)	Yes	It hasn't affected my physical health (No ha afectado mi salud física)	It hasn't affected my mental health (No ha afectado mi salud mental)	It has had a small effect (Ha tenido un pequeño efecto)
7279	Yes (Si)	si por que fue mas facil	Spanish (Español)	Yes	It hasn't affected my physical health (No ha afectado mi salud física)	It has had a small effect (Ha tenido un pequeño efecto)	It has had a small effect (Ha tenido un pequeño efecto)
7935	Yes (Si)	en mi casa es mas comodo para no salir	Spanish (Español)	Yes	It has had a small effect (Ha tenido un pequeño efecto)	It has had a small effect (Ha tenido un pequeño efecto)	It has had a large effect (Ha tenido un gran efecto)
7314	No		English (Ingles)	Yes	It hasn't affected my physical health (No ha afectado mi salud física)	It hasn't affected my mental health (No ha afectado mi salud mental)	It has had a large effect (Ha tenido un gran efecto)
7594	Yes (Si)	Because you have to wait for the appointment, and when Covid was there I was scared to go into a health clinic or a hospital	English (Ingles)	Yes	It hasn't affected my physical health (No ha afectado mi salud física)	It hasn't affected my mental health (No ha afectado mi salud mental)	It has had a small effect (Ha tenido un pequeño efecto)
2288	No		English (Ingles)	Yes	It hasn't affected my physical health (No ha afectado mi salud física)	It hasn't affected my mental health (No ha afectado mi salud mental)	It hasn't affected my economic situation (No ha afectado mi situación económica)
7148	Yes (Si)	si por que fue mas comodo de mi casa y mas practico	Spanish (Español)	Yes	It hasn't affected my physical health (No ha afectado mi salud física)	It hasn't affected my mental health (No ha afectado mi salud mental)	It has had a small effect (Ha tenido un pequeño efecto)
7062			English (Ingles)	Yes	It has had a small effect (Ha tenido un pequeño efecto)	It has had a small effect (Ha tenido un pequeño efecto)	It has had a small effect (Ha tenido un pequeño efecto)
7648	Yes (Si)	Because I was supposed to schedule a pap smear and the kit came during that time and I cancelled my appointment because I preferred not to go out.	English (Ingles)	Yes	It hasn't affected my physical health (No ha afectado mi salud física)	It hasn't affected my mental health (No ha afectado mi salud mental)	It hasn't affected my economic situation (No ha afectado mi situación económica)
7064	Yes (Si)	tengo ninos y no es facil	Spanish (Español)	Yes	It has had a large effect (Ha tenido un gran efecto)	It has had a large effect (Ha tenido un gran efecto)	It has had a small effect (Ha tenido un pequeño efecto)
8312	Yes (Si)	por que las citas son muy tardads	Spanish (Español)	Yes	It hasn't affected my physical health (No ha afectado mi salud física)	It hasn't affected my mental health (No ha afectado mi salud mental)	It has had a small effect (Ha tenido un pequeño efecto)
6085	Yes (Si)	por que mis hijos trabajan y estoy sola en la casa y no se manejar or mi hijo me pide un uber por que le tengo meido al COVID	Spanish (Español)	Yes	It hasn't affected my physical health (No ha afectado mi salud física)	It hasn't affected my mental health (No ha afectado mi salud mental)	It hasn't affected my economic situation (No ha afectado mi situación económica)
7323			Spanish (Español)	Yes	It hasn't affected my physical health (No ha afectado mi salud física)	It hasn't affected my mental health (No ha afectado mi salud mental)	It has had a small effect (Ha tenido un pequeño efecto)
7243	Yes (Si)	por que no queria ir a la clinica	Spanish (Español)	Yes	It hasn't affected my physical health (No ha afectado mi salud física)	It hasn't affected my mental health (No ha afectado mi salud mental)	It has had a large effect (Ha tenido un gran efecto)
2300	No		English (Ingles)	Yes	It has had a large effect (Ha tenido un gran efecto)	It has had a large effect (Ha tenido un gran efecto)	It has had a large effect (Ha tenido un gran efecto)
7555	Yes (Si)	por que tengo miedo de ir a la clinica	Spanish (Español)	Yes	It hasn't affected my physical health (No ha afectado mi salud física)	It has had a small effect (Ha tenido un pequeño efecto)	It has had a small effect (Ha tenido un pequeño efecto)
7123	Yes (Si)	my doctor told me there weren't giving any appointments due to the pandemic and they called me for the kit and i decided to do that and try it out since i had never done it before	Spanish (Español)	Yes	It hasn't affected my physical health (No ha afectado mi salud física)	It has had a small effect (Ha tenido un pequeño efecto)	It has had a small effect (Ha tenido un pequeño efecto)
6342	No		Spanish (Español)	Yes	It hasn't affected my physical health (No ha afectado mi salud física)	It hasn't affected my mental health (No ha afectado mi salud mental)	It has had a small effect (Ha tenido un pequeño efecto)
6592	No		English (Ingles)	Yes	It hasn't affected my physical health (No ha afectado mi salud física)	It hasn't affected my mental health (No ha afectado mi salud mental)	It has had a large effect (Ha tenido un gran efecto)
7677	Yes (Si)	como las clinicas no estan dejando a la gente entrar a las clinicas	Spanish (Español)	Yes	It has had a small effect (Ha tenido un pequeño efecto)	It hasn't affected my mental health (No ha afectado mi salud mental)	It has had a large effect (Ha tenido un gran efecto)
6633	Yes (Si)	por que no tuve que ir a la clinica por el tiempo que estamos vivendo	Spanish (Español)	Yes	It has had a large effect (Ha tenido un gran efecto)	It has had a large effect (Ha tenido un gran efecto)	It has had a large effect (Ha tenido un gran efecto)
7320			English (Ingles)	Yes	It has had a large effect (Ha tenido un gran efecto)	It has had a large effect (Ha tenido un gran efecto)	It has had a large effect (Ha tenido un gran efecto)
8307	No		Spanish (Español)	Yes	It has had a large effect (Ha tenido un gran efecto)	It has had a small effect (Ha tenido un pequeño efecto)	It has had a large effect (Ha tenido un gran efecto)
7121	No		Spanish (Español)	Yes	It has had a small effect (Ha tenido un pequeño efecto)	It hasn't affected my mental health (No ha afectado mi salud mental)	It has had a large effect (Ha tenido un gran efecto)
8680			Spanish (Español)	Yes	It hasn't affected my physical health (No ha afectado mi salud física)	It hasn't affected my mental health (No ha afectado mi salud mental)	It has had a small effect (Ha tenido un pequeño efecto)
6548			English (Ingles)	Yes	It hasn't affected my physical health (No ha afectado mi salud física)	It has had a small effect (Ha tenido un pequeño efecto)	It has had a large effect (Ha tenido un gran efecto)
7788	Yes (Si)	me siente mas segura hacerlo en la casa	Spanish (Español)	Yes	It hasn't affected my physical health (No ha afectado mi salud física)	It hasn't affected my mental health (No ha afectado mi salud mental)	It has had a small effect (Ha tenido un pequeño efecto)
8026	Yes (Si)	en la clinica hay mas infectados	Spanish (Español)	Yes	It has had a large effect (Ha tenido un gran efecto)	It has had a large effect (Ha tenido un gran efecto)	It has had a large effect (Ha tenido un gran efecto)
8901	No		Spanish (Español)	Yes	It hasn't affected my physical health (No ha afectado mi salud física)	It hasn't affected my mental health (No ha afectado mi salud mental)	It hasn't affected my economic situation (No ha afectado mi situación económica)
5901			English (Ingles)	Yes	It has had a small effect (Ha tenido un pequeño efecto)	It hasn't affected my mental health (No ha afectado mi salud mental)	It has had a small effect (Ha tenido un pequeño efecto)
6436			English (Ingles)	Yes	It has had a small effect (Ha tenido un pequeño efecto)	It has had a small effect (Ha tenido un pequeño efecto)	It hasn't affected my economic situation (No ha afectado mi situación económica)
9854			Spanish (Español)	Yes	It has had a small effect (Ha tenido un pequeño efecto)	It hasn't affected my mental health (No ha afectado mi salud mental)	It has had a large effect (Ha tenido un gran efecto)
8550	Yes (Si)	las clinicas estban cerradas y no abia citas	Spanish (Español)	Yes	It hasn't affected my physical health (No ha afectado mi salud física)	It hasn't affected my mental health (No ha afectado mi salud mental)	It has had a large effect (Ha tenido un gran efecto)
6799	Yes (Si)	Just by going through the mail I couldn't go there myself and I was wishing I could have taken it there to the clinic.	English (Ingles)	Yes	It has had a small effect (Ha tenido un pequeño efecto)	It has had a large effect (Ha tenido un gran efecto)	It has had a small effect (Ha tenido un pequeño efecto)
8952			Spanish (Español)	Yes	It has had a large effect (Ha tenido un gran efecto)	It has had a small effect (Ha tenido un pequeño efecto)	It hasn't affected my economic situation (No ha afectado mi situación económica)
9809	No		Spanish (Español)	Yes	It has had a small effect (Ha tenido un pequeño efecto)	It hasn't affected my mental health (No ha afectado mi salud mental)	It has had a large effect (Ha tenido un gran efecto)
10035	Yes (Si)	soy invalida y tengo que alguien me mueve	Spanish (Español)	Yes	It has had a large effect (Ha tenido un gran efecto)	It hasn't affected my mental health (No ha afectado mi salud mental)	It has had a large effect (Ha tenido un gran efecto)
7827			English (Ingles)	Yes	It hasn't affected my physical health (No ha afectado mi salud física)	It hasn't affected my mental health (No ha afectado mi salud mental)	It has had a small effect (Ha tenido un pequeño efecto)
6304	Yes (Si)	It much much easier doing it here. I didn't have to leave home to do it or pay for gas or anything.	English (Ingles)	Yes	It has had a large effect (Ha tenido un gran efecto)	It has had a small effect (Ha tenido un pequeño efecto)	It has had a large effect (Ha tenido un gran efecto)
7930			English (Ingles)	Yes	It hasn't affected my physical health (No ha afectado mi salud física)	It hasn't affected my mental health (No ha afectado mi salud mental)	It has had a small effect (Ha tenido un pequeño efecto)
8815	Yes (Si)	por que no habia citas pronto y hay muchas personas en la clinic	Spanish (Español)	Yes	It has had a large effect (Ha tenido un gran efecto)	It hasn't affected my mental health (No ha afectado mi salud mental)	It hasn't affected my economic situation (No ha afectado mi situación económica)
8986			Spanish (Español)	Yes	It hasn't affected my physical health (No ha afectado mi salud física)	It has had a small effect (Ha tenido un pequeño efecto)	It has had a small effect (Ha tenido un pequeño efecto)
8062	Yes (Si)	porque no habia citas en la clinica	Spanish (Español)	Yes	It has had a small effect (Ha tenido un pequeño efecto)	It has had a small effect (Ha tenido un pequeño efecto)	It has had a small effect (Ha tenido un pequeño efecto)
8055	No		English (Ingles)	Yes	It hasn't affected my physical health (No ha afectado mi salud física)	It hasn't affected my mental health (No ha afectado mi salud mental)	It hasn't affected my economic situation (No ha afectado mi situación económica)
8698	No		English (Ingles)	Yes	It hasn't affected my physical health (No ha afectado mi salud física)	It hasn't affected my mental health (No ha afectado mi salud mental)	It hasn't affected my economic situation (No ha afectado mi situación económica)
9532	Yes (Si)	por como estaba la pandemia	Spanish (Español)	Yes	It hasn't affected my physical health (No ha afectado mi salud física)	It hasn't affected my mental health (No ha afectado mi salud mental)	It has had a small effect (Ha tenido un pequeño efecto)
7746	Yes (Si)	porque no podia ir a la clinca y no habia citas	Spanish (Español)	Yes	It hasn't affected my physical health (No ha afectado mi salud física)	It has had a small effect (Ha tenido un pequeño efecto)	It hasn't affected my economic situation (No ha afectado mi situación económica)
8682			Spanish (Español)	Yes	It hasn't affected my physical health (No ha afectado mi salud física)	It hasn't affected my mental health (No ha afectado mi salud mental)	It has had a large effect (Ha tenido un gran efecto)
8774	No		Spanish (Español)	Yes	It hasn't affected my physical health (No ha afectado mi salud física)	It hasn't affected my mental health (No ha afectado mi salud mental)	It hasn't affected my economic situation (No ha afectado mi situación económica)
8248	No		English (Ingles)	Yes	It has had a small effect (Ha tenido un pequeño efecto)	It has had a small effect (Ha tenido un pequeño efecto)	It has had a large effect (Ha tenido un gran efecto)
8604			English (Ingles)	Yes	It hasn't affected my physical health (No ha afectado mi salud física)	It hasn't affected my mental health (No ha afectado mi salud mental)	It has had a small effect (Ha tenido un pequeño efecto)
8001	No		English (Ingles)	Yes	It hasn't affected my physical health (No ha afectado mi salud física)	It hasn't affected my mental health (No ha afectado mi salud mental)	It hasn't affected my economic situation (No ha afectado mi situación económica)
10059	Yes (Si)	Pues, a la clinica no esaba llendo si no erea emergencia o symptomas de COVID.	Spanish (Español)	Yes	It hasn't affected my physical health (No ha afectado mi salud física)	It hasn't affected my mental health (No ha afectado mi salud mental)	It has had a small effect (Ha tenido un pequeño efecto)
10455	Yes (Si)	durante la pandemia me dabia miedo de ir a clinic	Spanish (Español)	Yes	It hasn't affected my physical health (No ha afectado mi salud física)	It has had a small effect (Ha tenido un pequeño efecto)	It has had a small effect (Ha tenido un pequeño efecto)
10273	No		Spanish (Español)	Yes	It hasn't affected my physical health (No ha afectado mi salud física)	It hasn't affected my mental health (No ha afectado mi salud mental)	It has had a large effect (Ha tenido un gran efecto)
9749	Yes (Si)	si porque con la pandemia hay mucho problemas	Spanish (Español)	Yes	It hasn't affected my physical health (No ha afectado mi salud física)	It hasn't affected my mental health (No ha afectado mi salud mental)	It has had a large effect (Ha tenido un gran efecto)
8161			English (Ingles)	Yes	It hasn't affected my physical health (No ha afectado mi salud física)	It has had a small effect (Ha tenido un pequeño efecto)	It has had a small effect (Ha tenido un pequeño efecto)
9713			Spanish (Español)	Yes	It hasn't affected my physical health (No ha afectado mi salud física)	It hasn't affected my mental health (No ha afectado mi salud mental)	It hasn't affected my economic situation (No ha afectado mi situación económica)
9446			English (Ingles)	Yes	It has had a small effect (Ha tenido un pequeño efecto)	It has had a large effect (Ha tenido un gran efecto)	It has had a small effect (Ha tenido un pequeño efecto)
8896	Yes (Si)	It is convenient, I can use it and be done.	English (Ingles)	Yes	It has had a small effect (Ha tenido un pequeño efecto)	It hasn't affected my mental health (No ha afectado mi salud mental)	It hasn't affected my economic situation (No ha afectado mi situación económica)
10200	No		Spanish (Español)	Yes	It hasn't affected my physical health (No ha afectado mi salud física)	It hasn't affected my mental health (No ha afectado mi salud mental)	It hasn't affected my economic situation (No ha afectado mi situación económica)
10272			English (Ingles)	Yes	It hasn't affected my physical health (No ha afectado mi salud física)	It hasn't affected my mental health (No ha afectado mi salud mental)	It has had a large effect (Ha tenido un gran efecto)
9576	No		English (Ingles)	Yes	It hasn't affected my physical health (No ha afectado mi salud física)	It hasn't affected my mental health (No ha afectado mi salud mental)	It has had a small effect (Ha tenido un pequeño efecto)
8797			English (Ingles)	Yes	It hasn't affected my physical health (No ha afectado mi salud física)	It has had a large effect (Ha tenido un gran efecto)	It hasn't affected my economic situation (No ha afectado mi situación económica)
10116	Yes (Si)	It was more efficient and she would not need to go in and get exposed to COVID. Better and a great choice, she could take care of her health from home.	English (Ingles)	Yes	It hasn't affected my physical health (No ha afectado mi salud física)	It hasn't affected my mental health (No ha afectado mi salud mental)	It hasn't affected my economic situation (No ha afectado mi situación económica)
10249	Yes (Si)	The clinics were closed, so I did not have access.	Spanish (Español)	Yes	It has had a large effect (Ha tenido un gran efecto)	It hasn't affected my mental health (No ha afectado mi salud mental)	It has had a large effect (Ha tenido un gran efecto)
10457	No		English (Ingles)	Yes	It hasn't affected my physical health (No ha afectado mi salud física)	It has had a small effect (Ha tenido un pequeño efecto)	It has had a small effect (Ha tenido un pequeño efecto)
13260	No		English (Ingles)	Yes	It hasn't affected my physical health (No ha afectado mi salud física)	It hasn't affected my mental health (No ha afectado mi salud mental)	It hasn't affected my economic situation (No ha afectado mi situación económica)
9702	No		English (Ingles)	Yes	It has had a small effect (Ha tenido un pequeño efecto)	It hasn't affected my mental health (No ha afectado mi salud mental)	It has had a small effect (Ha tenido un pequeño efecto)
10630	No		English (Ingles)	Yes	It hasn't affected my physical health (No ha afectado mi salud física)	It hasn't affected my mental health (No ha afectado mi salud mental)	It hasn't affected my economic situation (No ha afectado mi situación económica)
10760	No		Spanish (Español)	Yes	It hasn't affected my physical health (No ha afectado mi salud física)	It has had a small effect (Ha tenido un pequeño efecto)	It has had a large effect (Ha tenido un gran efecto)
10808	Yes (Si)	Because they did not want many patients, so it was easier.	Spanish (Español)	Yes	It hasn't affected my physical health (No ha afectado mi salud física)	It hasn't affected my mental health (No ha afectado mi salud mental)	It has had a small effect (Ha tenido un pequeño efecto)
11073			English (Ingles)	Yes	It has had a large effect (Ha tenido un gran efecto)	It has had a large effect (Ha tenido un gran efecto)	It has had a large effect (Ha tenido un gran efecto)
11482			Spanish (Español)	Yes	It has had a small effect (Ha tenido un pequeño efecto)	It hasn't affected my mental health (No ha afectado mi salud mental)	It hasn't affected my economic situation (No ha afectado mi situación económica)
10517	Yes (Si)	Because most clinics were closed at the time and she could not make any appointments to see a doctor.	English (Ingles)	Yes	It hasn't affected my physical health (No ha afectado mi salud física)	It hasn't affected my mental health (No ha afectado mi salud mental)	It has had a large effect (Ha tenido un gran efecto)
10675			Spanish (Español)	Yes	It has had a large effect (Ha tenido un gran efecto)	It has had a large effect (Ha tenido un gran efecto)	It has had a large effect (Ha tenido un gran efecto)
14069	Yes (Si)	Whole more easier; more comfortable and not painful. She thinks more women would benefit from it.	English (Ingles)	Yes	It hasn't affected my physical health (No ha afectado mi salud física)	It has had a large effect (Ha tenido un gran efecto)	It has had a large effect (Ha tenido un gran efecto)
10557	Yes (Si)	You felt safer doing it at home.	English (Ingles)	Yes	It hasn't affected my physical health (No ha afectado mi salud física)	It has had a large effect (Ha tenido un gran efecto)	It has had a large effect (Ha tenido un gran efecto)
13273	Yes (Si)	Es dificil conseguir cita durante la pandemia entonces fue mas conveniente usar el kit de auto muestra.	Spanish (Español)	Yes	It has had a large effect (Ha tenido un gran efecto)	It hasn't affected my mental health (No ha afectado mi salud mental)	It has had a large effect (Ha tenido un gran efecto)
11430	Yes (Si)	Less stressful.	English (Ingles)	Yes	It hasn't affected my physical health (No ha afectado mi salud física)	It has had a large effect (Ha tenido un gran efecto)	It hasn't affected my economic situation (No ha afectado mi situación económica)
11098	Yes (Si)	It is more convenient and personal to self-test at home.	English (Ingles)	Yes	It has had a small effect (Ha tenido un pequeño efecto)	It has had a large effect (Ha tenido un gran efecto)	It has had a large effect (Ha tenido un gran efecto)
11391	Yes (Si)	Clinics were close and no appointments available.	Spanish (Español)	Yes	It has had a large effect (Ha tenido un gran efecto)	It hasn't affected my mental health (No ha afectado mi salud mental)	It has had a large effect (Ha tenido un gran efecto)
12009	Yes (Si)	I didn't want to get exposed	English (Ingles)	Yes	It has had a large effect (Ha tenido un gran efecto)	It has had a large effect (Ha tenido un gran efecto)	It has had a large effect (Ha tenido un gran efecto)
12116	No		English (Ingles)	Yes	It has had a small effect (Ha tenido un pequeño efecto)	It hasn't affected my mental health (No ha afectado mi salud mental)	It has had a small effect (Ha tenido un pequeño efecto)
11299	Yes (Si)	I didn't have to go in there and wait, I know the waiting period is long so I didn't have to go sit in the lobby and wait	English (Ingles)	Yes	It hasn't affected my physical health (No ha afectado mi salud física)	It has had a large effect (Ha tenido un gran efecto)	It has had a large effect (Ha tenido un gran efecto)
11446			English (Ingles)	Yes	It has had a small effect (Ha tenido un pequeño efecto)	It has had a small effect (Ha tenido un pequeño efecto)	It has had a large effect (Ha tenido un gran efecto)
11677	Yes (Si)	I probably needed it	English (Ingles)	Yes	It hasn't affected my physical health (No ha afectado mi salud física)	It hasn't affected my mental health (No ha afectado mi salud mental)	It hasn't affected my economic situation (No ha afectado mi situación económica)
11969			English (Ingles)	Yes	It hasn't affected my physical health (No ha afectado mi salud física)	It has had a small effect (Ha tenido un pequeño efecto)	It has had a large effect (Ha tenido un gran efecto)
12196	Yes (Si)	They offered it to me and I did it	Spanish (Español)	Yes	It has had a small effect (Ha tenido un pequeño efecto)	It has had a small effect (Ha tenido un pequeño efecto)	It has had a large effect (Ha tenido un gran efecto)
13253			Spanish (Español)	Yes	It hasn't affected my physical health (No ha afectado mi salud física)	It hasn't affected my mental health (No ha afectado mi salud mental)	It has had a large effect (Ha tenido un gran efecto)
13305	No		Spanish (Español)	Yes	It hasn't affected my physical health (No ha afectado mi salud física)	It hasn't affected my mental health (No ha afectado mi salud mental)	It has had a large effect (Ha tenido un gran efecto)
13729			Spanish (Español)	Yes	It has had a small effect (Ha tenido un pequeño efecto)	It has had a small effect (Ha tenido un pequeño efecto)	It has had a large effect (Ha tenido un gran efecto)
11330	Yes (Si)	Because there were not appointments in the clinics	Spanish (Español)	Yes	It hasn't affected my physical health (No ha afectado mi salud física)	It hasn't affected my mental health (No ha afectado mi salud mental)	It hasn't affected my economic situation (No ha afectado mi situación económica)
13093	No		Spanish (Español)	Yes	It has had a large effect (Ha tenido un gran efecto)	It has had a small effect (Ha tenido un pequeño efecto)	It has had a large effect (Ha tenido un gran efecto)
11173	No		Spanish (Español)	Yes	It hasn't affected my physical health (No ha afectado mi salud física)	It hasn't affected my mental health (No ha afectado mi salud mental)	It has had a large effect (Ha tenido un gran efecto)
12525	No		Spanish (Español)	Yes	It has had a large effect (Ha tenido un gran efecto)	It has had a small effect (Ha tenido un pequeño efecto)	It has had a large effect (Ha tenido un gran efecto)
13461			Spanish (Español)	Yes	It hasn't affected my physical health (No ha afectado mi salud física)	It hasn't affected my mental health (No ha afectado mi salud mental)	It hasn't affected my economic situation (No ha afectado mi situación económica)
12502			Spanish (Español)	Yes	It hasn't affected my physical health (No ha afectado mi salud física)	It hasn't affected my mental health (No ha afectado mi salud mental)	It hasn't affected my economic situation (No ha afectado mi situación económica)
11690			Spanish (Español)	Yes	It hasn't affected my physical health (No ha afectado mi salud física)	It hasn't affected my mental health (No ha afectado mi salud mental)	It has had a small effect (Ha tenido un pequeño efecto)
13410	No		Spanish (Español)	Yes	It hasn't affected my physical health (No ha afectado mi salud física)	It hasn't affected my mental health (No ha afectado mi salud mental)	It has had a large effect (Ha tenido un gran efecto)
7277			Spanish (Español)	Yes	It has had a small effect (Ha tenido un pequeño efecto)	It has had a small effect (Ha tenido un pequeño efecto)	It has had a small effect (Ha tenido un pequeño efecto)
12625			Spanish (Español)	Yes	It hasn't affected my physical health (No ha afectado mi salud física)	It hasn't affected my mental health (No ha afectado mi salud mental)	It has had a small effect (Ha tenido un pequeño efecto)
13593			Spanish (Español)	Yes	It hasn't affected my physical health (No ha afectado mi salud física)	It has had a small effect (Ha tenido un pequeño efecto)	It has had a large effect (Ha tenido un gran efecto)
12133			Spanish (Español)	Yes	It has had a small effect (Ha tenido un pequeño efecto)	It has had a small effect (Ha tenido un pequeño efecto)	It has had a large effect (Ha tenido un gran efecto)
12635			Spanish (Español)	Yes	It hasn't affected my physical health (No ha afectado mi salud física)	It hasn't affected my mental health (No ha afectado mi salud mental)	It has had a large effect (Ha tenido un gran efecto)
6665			Spanish (Español)	Yes	It has had a small effect (Ha tenido un pequeño efecto)	It has had a large effect (Ha tenido un gran efecto)	It has had a large effect (Ha tenido un gran efecto)
